# Supplementary material for: Single-cell quantification of a broad RNA spectrum reveals unique noncoding patterns associated with cell types and states
Source: PubMed Central journal article supplement (PMC8713755; doi:10.1073/pnas.2113568118), 2021-12-15
Supplement: pnas.2113568118.sapp.pdf [file pnas.2113568118.sapp.pdf]

# PNAS

[www.pnas.org](http://www.pnas.org)

**Supplementary Information for:**

**Single cell profiling of total RNA using Smart-seq-total**

Alina Isakova<sup>1</sup>, Norma Neff<sup>3</sup>, Stephen R. Quake<sup>1,2,3</sup>

<sup>1</sup>Department of Bioengineering, Stanford University, Stanford, California, USA

<sup>2</sup>Department of Applied Physics, Stanford University, Stanford, California, USA

<sup>3</sup>Chan Zuckerberg Biohub, San Francisco, California, USA

**Correspondence**

[steve@quake-lab.org](mailto:steve@quake-lab.org)

**This PDF file includes:**

Supplementary text  
Figures S1 to S19  
Tables S1 to S3  
SI References

**Other supplementary materials for this manuscript include the following:**

Datasets S1 to S7

**Supplementary text(protocol):**

CRISPR-mediated depletion of unwanted molecules from Smart-seq-total libraries (DASH<sup>1</sup>).

**Supplementary figures:**

Supplementary figure S1. Smart-seq-total performance.

Supplementary figure S2. Smart-seq-total v2 workflow.

Supplementary figure S3. Mapping statistics and gene coverage.

Supplementary figure S4. Comparison of Smart-seq-total with other scRNA-seq methods.

Supplementary figure S5. Number of coding and non-coding genes detected in primary fibroblasts, HEK293T and MCF7 cells.

Supplementary figure S6. Most abundant transcripts detected in primary fibroblasts, HEK293T and MCF7 cells.

Supplementary figure S7. Depletion of abundant miscRNA.

Supplementary figure S8. Cell type-specific marker genes grouped by RNA type.

Supplementary figure S9. Transcripts dynamically changing over the cell cycle identified in primary fibroblasts.

Supplementary figure S10. Transcripts dynamically changing over the cell cycle identified in HEK293T cells.

Supplementary figure S11. Transcripts dynamically changing over the cell cycle identified in MCF7 cells.

Supplementary figure S12. Clusters of coding and non-coding genes dynamically expressed throughout the cell cycle.

Supplementary figure S13. Cell cycle bias in cell clustering.

Supplementary figure S14. Sequencing of small RNA fraction of Smart-seq-total libraries.

Supplementary figure S15. Correlation of miRNA and mRNA levels across individual HEK 293T cells.

Supplementary figure S16. Number of coding and non-coding genes detected in mESCs at each stage of EB formation.

Supplementary figure S17. UMAP plots of lineages and key marker genes.

Supplementary figure S18. Genes differentially expressed between lineages.

Supplementary figure S19. Coding and non-coding gene correlation analysis.

**Supplementary tables:**

Supplementary table S1. CRISPR guides for rRNA depletion.

Supplementary table S2. Smart-seq-total primers used in the present study.

Supplementary table S3. Smart-seq-total cost estimate.

**Supplementary datasets:**

Supplementary Dataset S1. Cell cycle-specific gene clusters.

Supplementary Dataset S2. miRNA-mRNA target correlation scores.

Supplementary Dataset S3. Coding and non-coding markers of germ layer specification.

Supplementary Dataset S4. Correlation of germ layer-specific miRNAs and other coding and non-coding genes.

Supplementary Dataset S5. miRNA count tables obtained for 24 HEK293T cells.

Supplementary Dataset S6 and S7. Matching total and small RNA count tables obtained from 301 HEK293T cells.

## Supplementary protocol

### Prepare the guide RNA

1. Resuspend each crRNA oligo in IDTE buffer to a stock concentration of 100  $\mu\text{M}$  (add 20  $\mu\text{L}$  of buffer to each well).
2. Make a pool of all 57 crRNA: pool 2  $\mu\text{L}$  from guide 1 to 31 (A1 to C7, noA12) and 1  $\mu\text{L}$  from guides 32:57 (D1 to F2) to obtain 88  $\mu\text{L}$  (each guide will be at  $\sim 2.3 \mu\text{M}$ ).
3. Resuspend each tracrRNA in IDTE buffer to a stock concentration of 100  $\mu\text{M}$ .
4. Mix the crRNA and tracrRNA oligos in equimolar concentrations in a sterile microcentrifuge tube to a final duplex concentration of 10  $\mu\text{M}$ .

| Volume             | Component                                    |
|--------------------|----------------------------------------------|
| 88 $\mu\text{L}$   | 100 $\mu\text{M}$ Alt-R CRISPR-Cas9 crRNA    |
| 88 $\mu\text{L}$   | 100 $\mu\text{M}$ Alt-R CRISPR-Cas9 tracrRNA |
| 704 $\mu\text{L}$  | Nuclease-Free Duplex Buffer                  |
| 1140 $\mu\text{L}$ | Total volume                                 |

4. Heat the duplex at 95°C for 5 min.
5. Remove from heat and allow to cool to room temperature (15–25°C). Store as 5-10  $\mu\text{L}$  aliquots at -80°C for limited time.

### Create the RNP complex

6. Combine the guide RNA and Cas9 enzyme (20  $\mu\text{M}$  stock from NEB) in equimolar amounts:

| Volume            | Component                       |
|-------------------|---------------------------------|
| 28 $\mu\text{L}$  | 10 $\mu\text{M}$ crRNA:tracrRNA |
| 14 $\mu\text{L}$  | S.p. Cas9 (20 $\mu\text{M}$ )   |
| 238 $\mu\text{L}$ | PBS                             |
| 280 $\mu\text{L}$ | Total volume                    |

† Cas9 RNP complexes can be made in PBS or in Cas9 dilution buffer (30 mM HEPES, 150 mM KCl, pH 7.5).

7. Incubate at room temperature for 5–10 min for optimal formation of the RNP complex.

### Perform the *in vitro* digestion reaction

8. Assemble the reaction at room temperature (15–25°C):

| Volume            | Component                                                                |
|-------------------|--------------------------------------------------------------------------|
| 40 $\mu\text{L}$  | 10X Cas9 Nuclease Reaction Buffer                                        |
| 280 $\mu\text{L}$ | 1 $\mu\text{M}$ Cas9 RNP                                                 |
| 80 $\mu\text{L}$  | Sequencing library (10 nM) (Use nuclease free water to dilute if needed) |
| 400 $\mu\text{L}$ | Total volume                                                             |

† The molar ratio of Cas9 RNP:Library should be 40:1 or higher. Final concentration of RNPs is 100 nM (2.3 nM for each guide).

9. Incubate the reaction at 37°C for 60 min.
10. Add 1 µL Proteinase K (20 mg/mL) to the reaction, then incubate the mixture at 56°C for 10 min to release the DNA substrate from the Cas9 endonuclease.
11. Clean-up using 0.8X or 1X ratio of SPRI Select. Elute in 30uL.

**Cytoplasmic rRNA  
and miscRNA**

**Target Sequence**

|                  |                             |
|------------------|-----------------------------|
| RNA7SK_1         | GTCCATTTGTAGGAGAACGT        |
| RNA7SK_2         | TCCAAATGAGGCGCTGCATG        |
| RNA7SK_3         | ACCCTACGTTCTCCTACAAA        |
| RNA7SK2_1        | CACTAAGTTCGGCATCAATA        |
| RNA7SK2_2        | GACCACCAGGTTGCCTAAGG        |
| <i>RNA7SK2_3</i> | <i>GGAGTGCAGTGGCTATTCAC</i> |
| 7SL_1            | CACTAAGTTCGGCATCAATA        |
| 7SL_2            | GACCACCAGGTTGCCTAAGG        |
| 5.8S_1           | CGACACTTCGAACGCACTTG        |
| 5.8S_2           | ACTCTTAGCGGTGGATCACT        |
| 5S.1             | TCTGATCTCGGAAGCTAAGC        |
| 5S.2             | CTCCCATCCAAGTACTAACC        |

|     |
|-----|
| A01 |
| A02 |
| A03 |
| A04 |
| A05 |
|     |
| A06 |
| A07 |
| A08 |
| A09 |
| A10 |
| A11 |

**mtRNA**

|            |                       |
|------------|-----------------------|
| MT-RNR1_1  | TTGACCTAACGTCTTTACGT  |
| MT-RNR1_2  | CACGAAATTGACCAACCCTG  |
| MT-RNR1_3  | AGGGTGAACCTCACTGGAACG |
| MT-RNR1_4  | AGTAGAGTGCTTAGTTGAAC  |
| MT-RNR1_5  | GTAGTCTATTTTGTGTCAAC  |
| MT-RNR1_6  | AGAGGAGACAAGTCGTAACA  |
| MT-RNR1_7  | GGGTTTATCGATTACAGAAC  |
| MT-RNR2_1  | CTGAACTCCTCACACCCAAT  |
| MT-RNR2_2  | AAGGTTGTCTGGTAGTAAGG  |
| MT-RNR2_3  | CCTCACTGTCAACCCAACAC  |
| MT-RNR2_4  | GCCGTTAAACATGTGTCACT  |
| MT-RNR2_5  | GCTGCTTTTAGGCCTACTAT  |
| MT-RNR2_6  | TTGGACAACCAGCTATCACC  |
| MT-RNR2_7  | CTGTTCTTAGGTAGCTCGTC  |
| MT-RNR2_8  | TGAGATGATATCATTTACGG  |
| MT-RNR2_9  | TGTTCCGTTGGTCAAGTTAT  |
| MT-RNR2_10 | TTTGGTAGTTTAGGACCTGT  |
| MT-RNR2_11 | CTGTATGAATGGCTCCACGA  |

|     |
|-----|
| B01 |
| B02 |
| B03 |
| B04 |
| B05 |
| B06 |
| B07 |
| B08 |
| B09 |
| B10 |
| B11 |
| B12 |
| C01 |
| C02 |
| C03 |
| C04 |
| C05 |
| C06 |



MT-RNR2\_12

TTTAATAGCGGCTGCACCAT

C07

**18S and 28S**

18S\_1 TAGAGTCACCAAAGCCGCCG  
18S\_2 CTCCAATGGATCCTCGTTAA  
18S\_3 TAGAGCTAATACATGCCGAC  
18S\_4 ACGGCTACCACATCCAAGGA  
18S\_5 AATTACCCACTCCCGACCCG  
18S\_6 CATGTCTAAGTACGCACGGC  
18S\_7 CATGGTGACCACGGGTGACG  
18S\_8 ACTCAGCTAAGAGCATCGAG  
18S\_9 AGTCGTAACAAGGTTTCCGT  
18S\_10 CATCCAATCGGTAGTAGCGA  
18S\_11 CATCACGAATGGGGTTCAAC  
18S\_12 GTTGAGTCAAATTAAGCCGC  
18S\_13 ATTCTTGACCGGCGCAAGA  
28S\_1 CGGACAAACCCTTGTGTCGA  
28S\_2 GGACGAAGGGCACTCCGCAC  
28S\_3 CGGTTCTCTCGTACTGAGC  
28S\_4 CACTAATAGGGAACGTGAGC  
28S\_5 ATTCGTAGACGACCTGCTTC  
28S\_6 GGCTCCCAAACCACGCTCCC  
28S\_7 GGTCGACCCGGGACACGTGC  
28S\_8 CCGTCGGGACGAACCGCAAC  
28S\_9 CTCGTGACCTCTCCTCGGTC  
28S\_10 CCGTCTCGGTCGGCACTCCG  
28S\_11 CTAAGTGTCAAGAGCCGAGA  
28S\_12 GAGGAAGCATTACTGGCTGA  
28S\_13 ACGGTGGAGCTGGGACCACG

D01

D02

D03

D04

D05

D06

D07

D08

D09

D10

D11

D12

E01

E02

E03

E04

E05

E06

E07

E08

E09

E10

E11

E12

F01

F02

## Supplementary figure captions:

### Supplementary figure S1. Smart-seq-total performance.

- a. Sequencing scheme of a scRNA-seq library prepared with Smart-seq-total.
- b. Bioanalyzer traces showing fragment sizes of amplified cDNA prepared from single cells using Smart-seq-total with and without TSO removal step.
- c. Average number of genes per biotype detected by Smart-seq2 and Smart-seq-total in single HEK293T cells. Smart-seq-total libraries were obtained from cells sorted in 3 uL of lysis buffer (See *Methods Comparison of Smart-seq2 and Smart-seq-total* for details). Genes were assigned to a specific biotype based on GENCODE v32 annotation for the reference genome. tRNA was quantified using high-confidence gene set obtained from GtRNAdb. Adaptor-depleted libraries, for both Smart-seq2 and Smart-seq-total, were depth normalized to ~2.5 Mio reads per cell. Error bars denote standard deviation (n=7).
- d. Mean number of genes per biotype detected by Smart-seq2 and Smart-seq-total in single HEK293T cells. Same as c but for tRNA, miscRNA, TEC, intronic and antisense transcripts.
- e. Read coverage of multiple gene biotypes shown for Smart-seq2 and Smart-seq-total data. Computed as a sum of n=7 cells.

### Supplementary figure S2. Smart-seq-total v2 workflow.

- a. Sequencing scheme of a scRNA-seq library prepared with Smart-seq-total v2.
- b. Schematic workflow of Smart-seq-total v2. Following cell lysis, total cellular RNA is polyadenylated and 5'prime capped, primed with anchored UMI-containing oligo dT and reverse transcribed in a presence of the custom degradable TSO. After reverse transcription, TSO is enzymatically cleaved, single-stranded cDNA is amplified and cleaned up. Amplified cDNA is then either tagged or directly indexed, pooled and depleted from ribosomal sequences using DASH<sup>1</sup>. Resulting indexed libraries are then pooled and sequenced on Illumina platform.
- c. Effects of the 5'-prime capping on the cDNA yield.
- d. Fragment analyzer traces showing the effect of the reverse primer addition during the cDNA amplification step. Left-over UMI-containing oligodT (dT22VN) from the RT step remains in the reaction during the cDNA amplification thus could potentially prime cDNA and 'inflate' the UMI count. However, the melting temperature of Smart-seq (v2) oligodT is designed to be > 10 degrees below the annealing temperature of our PCR primers. Under these conditions and in the absence of reverse prime, the oligodT yields negligible amplification of cDNA.
- e. Schematic diagram of Smart-seq-total v2 data analysis.
- f. Correlation between raw and UMI-corrected counts obtained from Smart-seq-total v2 scRNA-seq data generated from 39 HEK293T cells. Each dot represents individual gene in a given cell.

### Supplementary figure S3. Mapping statistics and gene coverage.

- a. Schematic view of the library preparation workflow following cDNA amplification in Smart-seq-total v1. Gene body coverage, computed as an average across housekeeping genes using RSeQC v4.0<sup>2</sup>. Each colored line represents an individual cell.
- b. Same as a, but for Smart-seq-total v2.
- c. Mapping statistics generated based on data generated from the workflow described in a.
- d. Same as c, but for Smart-seq-total v2.
- e. Absolute number of UMIs detected per input ERCC molecules. Lines indicate the range found across wells. The data has not been depth normalized.
- f. Sensitivity of Smart-seq-total v2, calculated as the number of ERCC molecules needed to reach a 50% detection probability as described in Svensson et al.<sup>3</sup> and Bagnoli et al.<sup>4</sup> is equal to 4.6 molecules (median across 39 samples). Per-cell distributions are shown using violin plots with vertical lines and numbers indicating the median across wells.

**Supplementary figure S4. Comparison of Smart-seq-total with other scRNA-seq methods.**

- a. Qualitative comparison of Smart-seq-total, Smart-seq2/3, Holo-seq, SUPeR-seq and MATQ-seq.
- b. Number of genes detected withing each RNA type across different methods (cpm>=1). Datasets were depth normalized to the lowest number of reads per library (~1 Mio reads per cell). Error bars denote standard deviation. Numbers in the legend indicate the number of cells included in the comparison (available from the respective studies).
- c. Gene body coverage, computed as an average across all genes using RSeQC v4.0<sup>2</sup>. Coverage for Smart-seq-total tagmented and non-tagmented libraries is computed separately.
- d. Fraction of reads mapping to exons, introns and intergenic regions across compared methods.

**Supplementary figure S5. Number of coding and non-coding genes detected in primary fibroblasts, HEK293T and MCF7 cells.**

- a. Number of counts and number of genes per cell grouped by RNA type. Computed based on 612 profiled cells.
- b. Number of genes, number of counts as well as the percentage of mitochondrial and histone RNA per cell computed for primary fibroblasts, HEK293T and MCF7 cells.
- c. Number of detected genes by RNA type in the three profiled cell types.

**Supplementary figure S6. Most abundant transcripts detected in primary fibroblasts, HEK293T and MCF7 cells.**

Top 100 genes in each of the three profiled cell types supported by the largest number of reads. Red arrows indicate cell type-specific genes.

**Supplementary figure S7. Depletion of abundant miscRNA.**

- a. Distribution of mapped reads across RNA types in HEK293T cells and MCF7 cells. The abundant RNA species were depleted from the final libraries using either v1 or v2 sets of CRISPR guides (DASH v1 or DASH v2 respectively).
- b. Levels of ACTB, RN7SK and RN7SL detected in libraries depleted using either DASH v1 or DASH v2.

**Supplementary figure S8. Cell type-specific marker genes grouped by RNA type.**

- a. Dot plots of marker genes identified in primary fibroblasts, HEK293T and MCF7 cells grouped by RNA type.
- b. Relative levels of 21 tRNA (iMet-tRNA) types identified in fibroblasts, HEK293T and MCF7 cells as a fraction of total reads mapped to tRNA genes.
- c. Loadings of the first ten principal components that define the separation of primary fibroblasts, HEK293T and MCF7 based on 'other small ncRNA' (snoRNA, scaRNA, snRNA and tRNA) shown in Figure 1f (left panel).
- d. Top 25 small ncRNAs (among snoRNA, scaRNA, snRNA and tRNA classes) differentially expressed across the cell types.

**Supplementary figure S9. Transcripts dynamically changing over the cell cycle identified in primary fibroblasts.**

Coding and non-coding RNAs differentially expressed across the cell cycle in primary dermal fibroblasts. Grouped by RNA type. Circular charts depict average expression of a given gene across all cells identified to be in a certain phase of the cell cycle.

**Supplementary figure S10. Transcripts dynamically changing over the cell cycle identified in HEK293T cells.**

Same as Supplementary fig. 9 but for HEK293T cells.

**Supplementary figure S11. Transcripts dynamically changing over the cell cycle identified in MCF7 cells.**

Same as Supplementary fig. 9-10 but for MCF7 cells.

**Supplementary figure S12. Clusters of coding and non-coding genes dynamically expressed throughout the cell cycle.**

Universal and cell-type specific gene clusters composed of coding and non-coding genes that dynamically change through the cell cycle. Hierarchical clustering was performed on a mixed-gene group composed of top 750 mRNAs differentially expressed through the cell-cycle and non-coding

genes expressed in least one phase. For more information on cluster composition see Supplementary table 2.

**Supplementary figure S13. Cell cycle bias in cell clustering.**

- a. t-SNE plot of the three profiled human cell types generated based on all detected genes.
- b. t-SNE plot of the three profiled human cell types colored by cell cycle phase.
- c. t-SNE plots colored by expression of selected cell-cycle and histone genes. Color scale adjacent to each plot denotes the expression of a given gene as  $\ln(\text{cpm}+1)$ .

**Supplementary figure S14. Sequencing of small RNA fraction of Smart-seq-total libraries.**

- a. Mapping statistics of the obtained small RNA libraries.
- b. Coverage of small RNAs detected in HEK293T cells across the length of the precursor RNAs (divided into 100 bins).
- c. Overlap of miRNAs detected by Smart-seq-total v2 and in Faridani et al.<sup>5</sup> in single HEK293T cells as well in the bulk RNA sample.
- d. Correlation of selected mature miRNA expression across 24 HEK 293T cells. Schematics of miR-17/92 and its paralog miRNA clusters is depicted in the upper left corner.
- e. Levels of the -5p and -3p arms of the same miRNA detected in HEK293T cells. Average values across 24 cells are shown. Error bars denote standard deviation.
- f. Correlation of miR-92a-3p and miR-25-3p, which belong to the same miRNA family, levels across 301 HEK293T cells.

**Supplementary figure S15. Correlation of miRNA and mRNA levels across individual HEK 293T cells.**

- a. Pair-wise correlation scores computed for miR-92a-3p and miR-25-3p and the rest of the genes (~8'000 genes; each gene present in at least 30 cells at  $\text{cpm}>1$ ) detected in individual HEK293T cells. P-values of correlations were computed using t-test and adjusted using Benjamini-Hochberg correction.
- b. Top 10 enriched GO terms computed based on the most correlated and anti-correlated with miR-92a-3p (left) and miR-25-3p (right) coding genes.

**Supplementary figure S16. Number of coding and non-coding genes detected in mESCs at each stage of EB formation.**

- a. Total number of detected genes and counts, as well as the percentage of mitochondrial and histone RNA, detected in each cell collected at day 0, day 4, day 8 and day 12 of embryoid body formation.
- b. Number of counts and number of genes detected in each cell at days 0, 4, 8 and 12 of embryoid body formation. Grouped by RNA type.

**Supplementary figure S17. UMAP plots of lineages and key marker genes.**

- a. UMAP plot of collected murine cells colored by annotated cell types.
- b. UMAP plots showing the expression of lineage markers. Color scale adjacent to each plot denotes the expression of a given gene as  $\ln(\text{normalized counts} + 1)$ .
- c. UMAP plot of collected murine cells colored by cell cycle phase.

**Supplementary figure S18. Genes differentially expressed between lineages.**

- a. Genes differentially expressed between annotated lineages and primed mESCs.
- b. Non-coding genes differentially expressed between annotated lineages and primed mESCs. Primed mESCs are marked by the expression of *Nanog*, *Pou5f1* and *Esrrb*.
- c. UMAP plots showing the expression of miRNAs in profiled cells. Color scale adjacent to each plot denotes the expression of a given gene as  $\ln(\text{normalized counts} + 1)$ .

**Supplementary figure S19. Coding and non-coding gene correlation analysis.**

- a. Pair-wise correlation scores computed for germ layer specific miRNAs and the rest of the genes detected across individual differentiating cells. Average normalized expression of each gene is computed across all cells. Correlations with Pearson's  $r > 0.3$  and  $< -0.3$  and Benjamini-Hochberg adjusted P-value  $< 0.01$  are shown. Top 10 enriched GO terms computed based on the most correlated and anti-correlated genes.
- b. Positively correlated coding and non-coding genes in differentiating mESCs. Gene correlation was evaluated through pairwise correlation analysis across all cells collected at four stages of EB formation. Genes with spearman  $\rho > 0.5$  (P-value  $< 10^{-5}$ ) were considered co-expressed.
- c. Anticorrelation of coding and non-coding genes. Evaluated through pairwise gene correlation analysis across all cells. Genes with spearman  $\rho < -0.5$  were considered to be anticorrelated (P-value  $< 0.01$ ).

# Supplementary figure 1

**a**

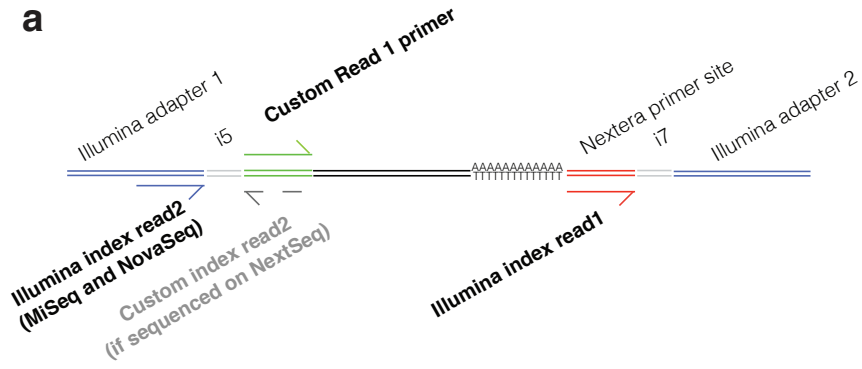

**b**

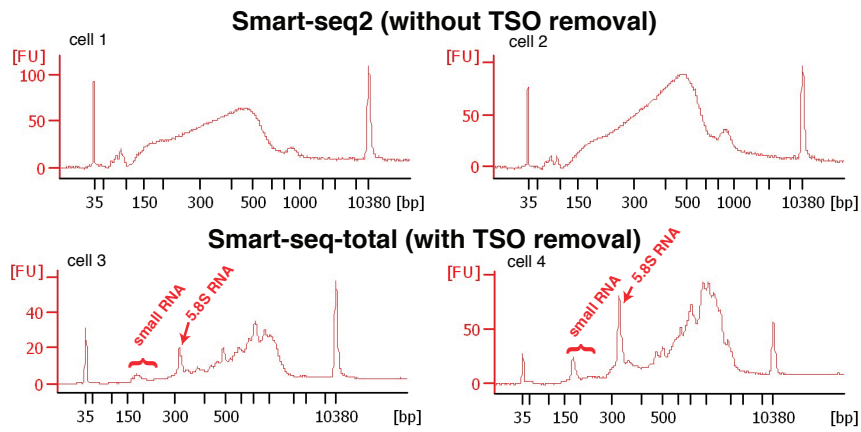

**d**

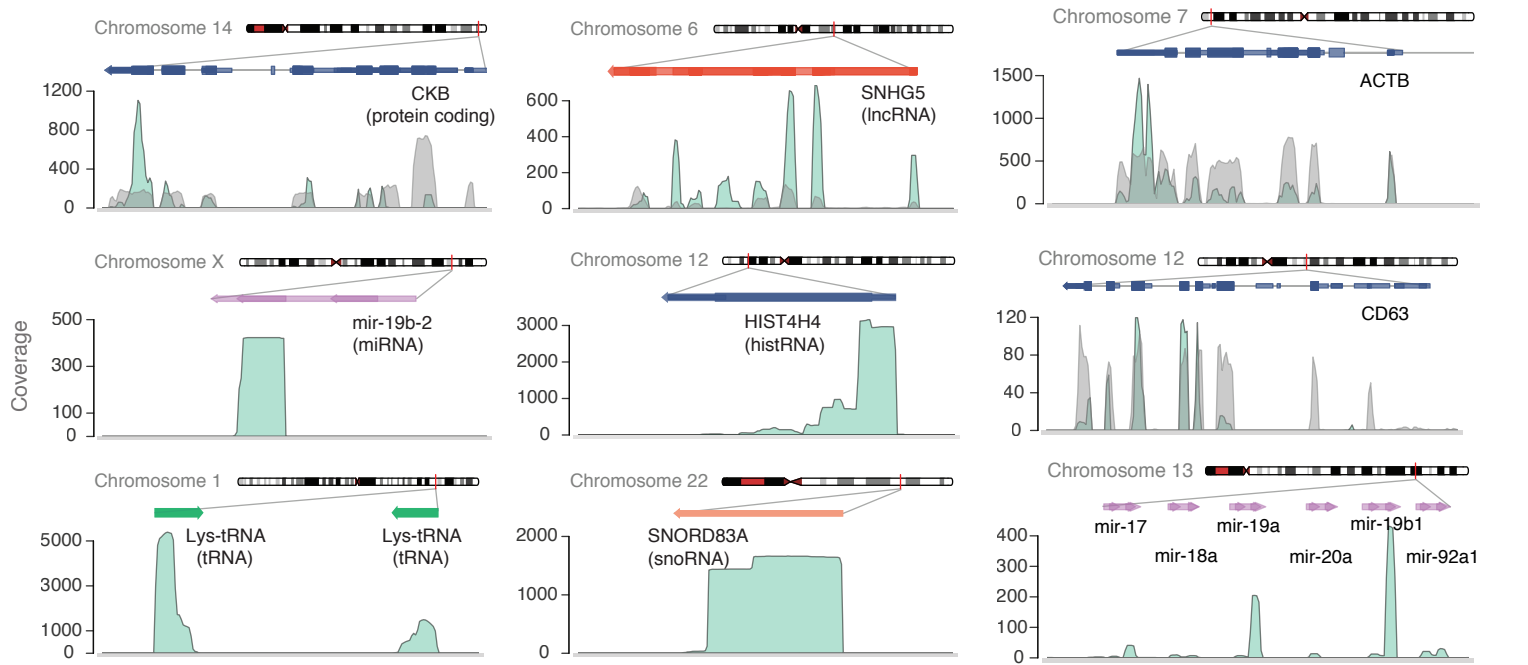

**c**

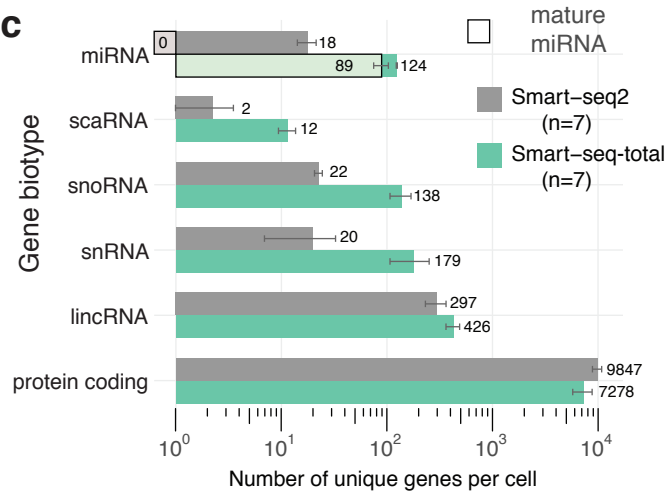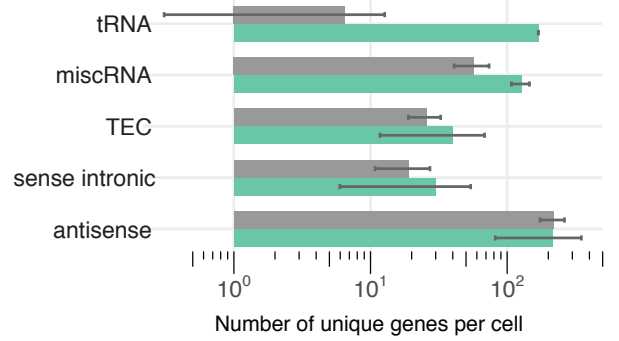

# Supplementary figure 2

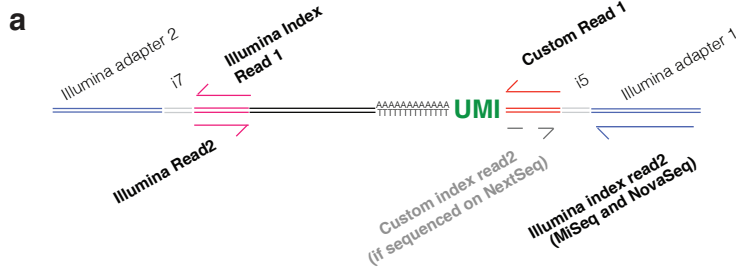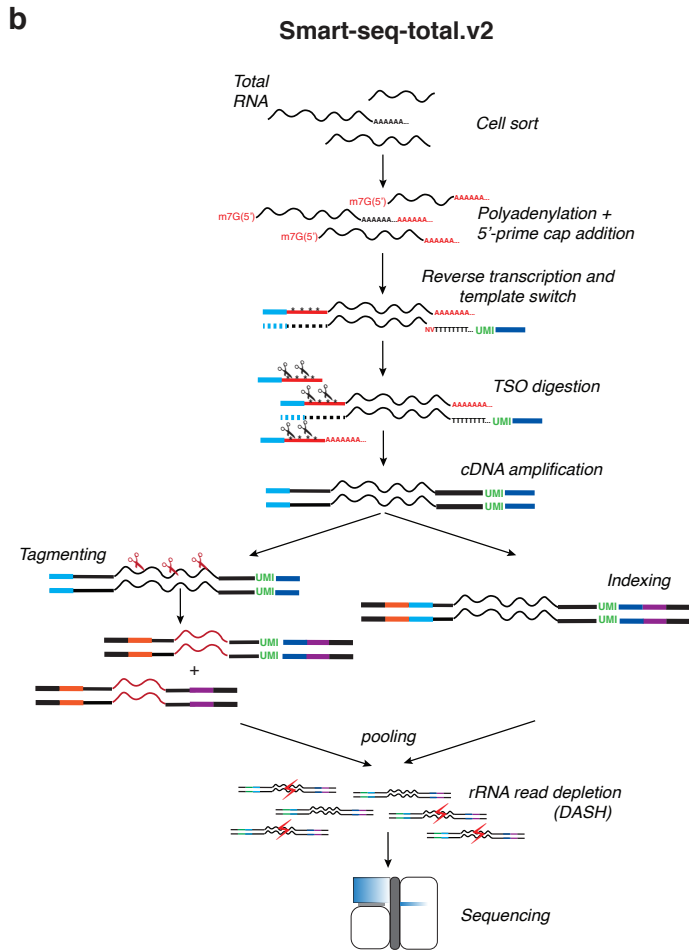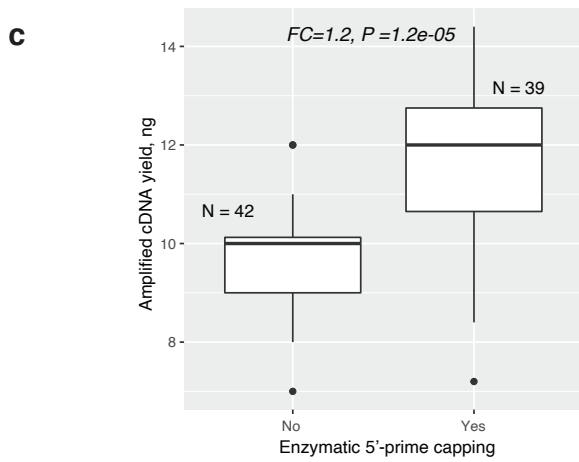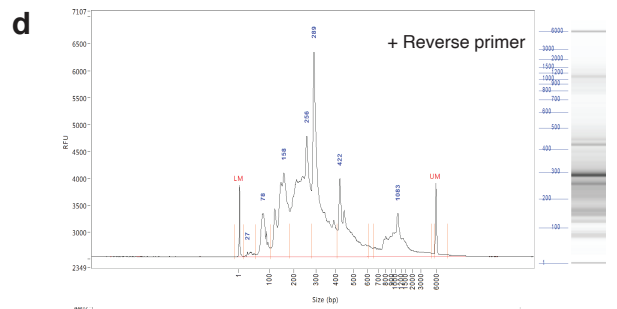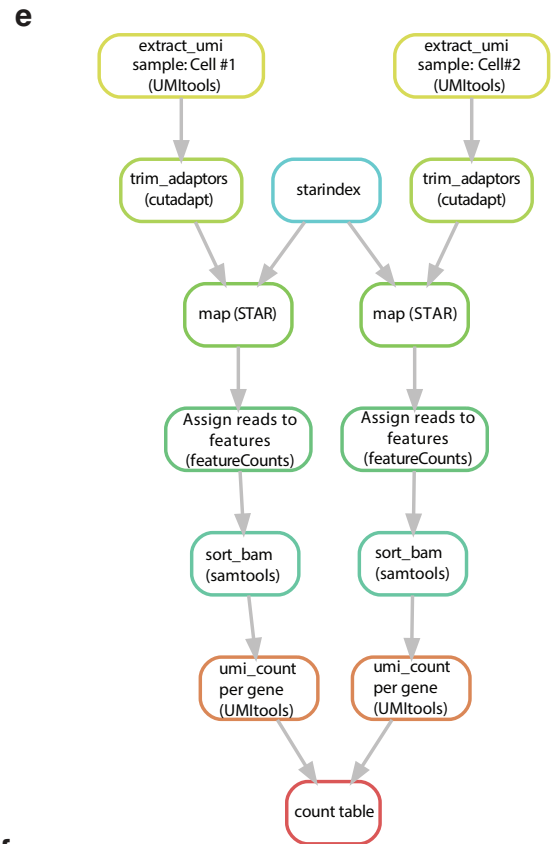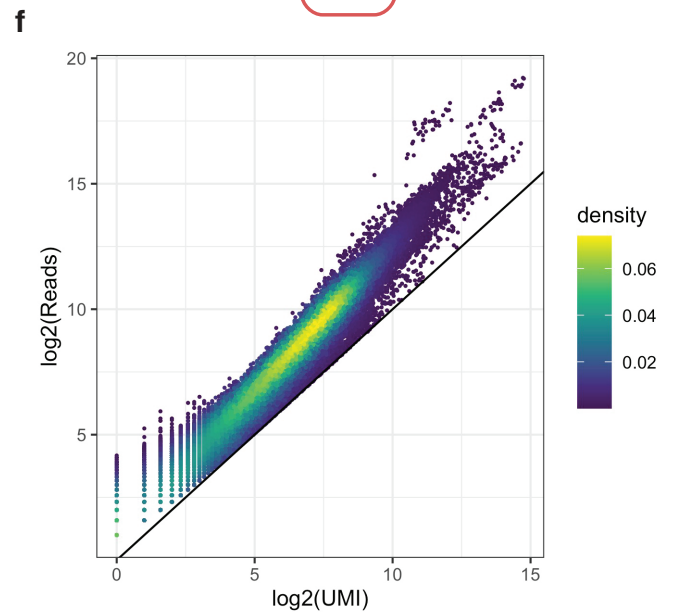



Supplementary figure 3

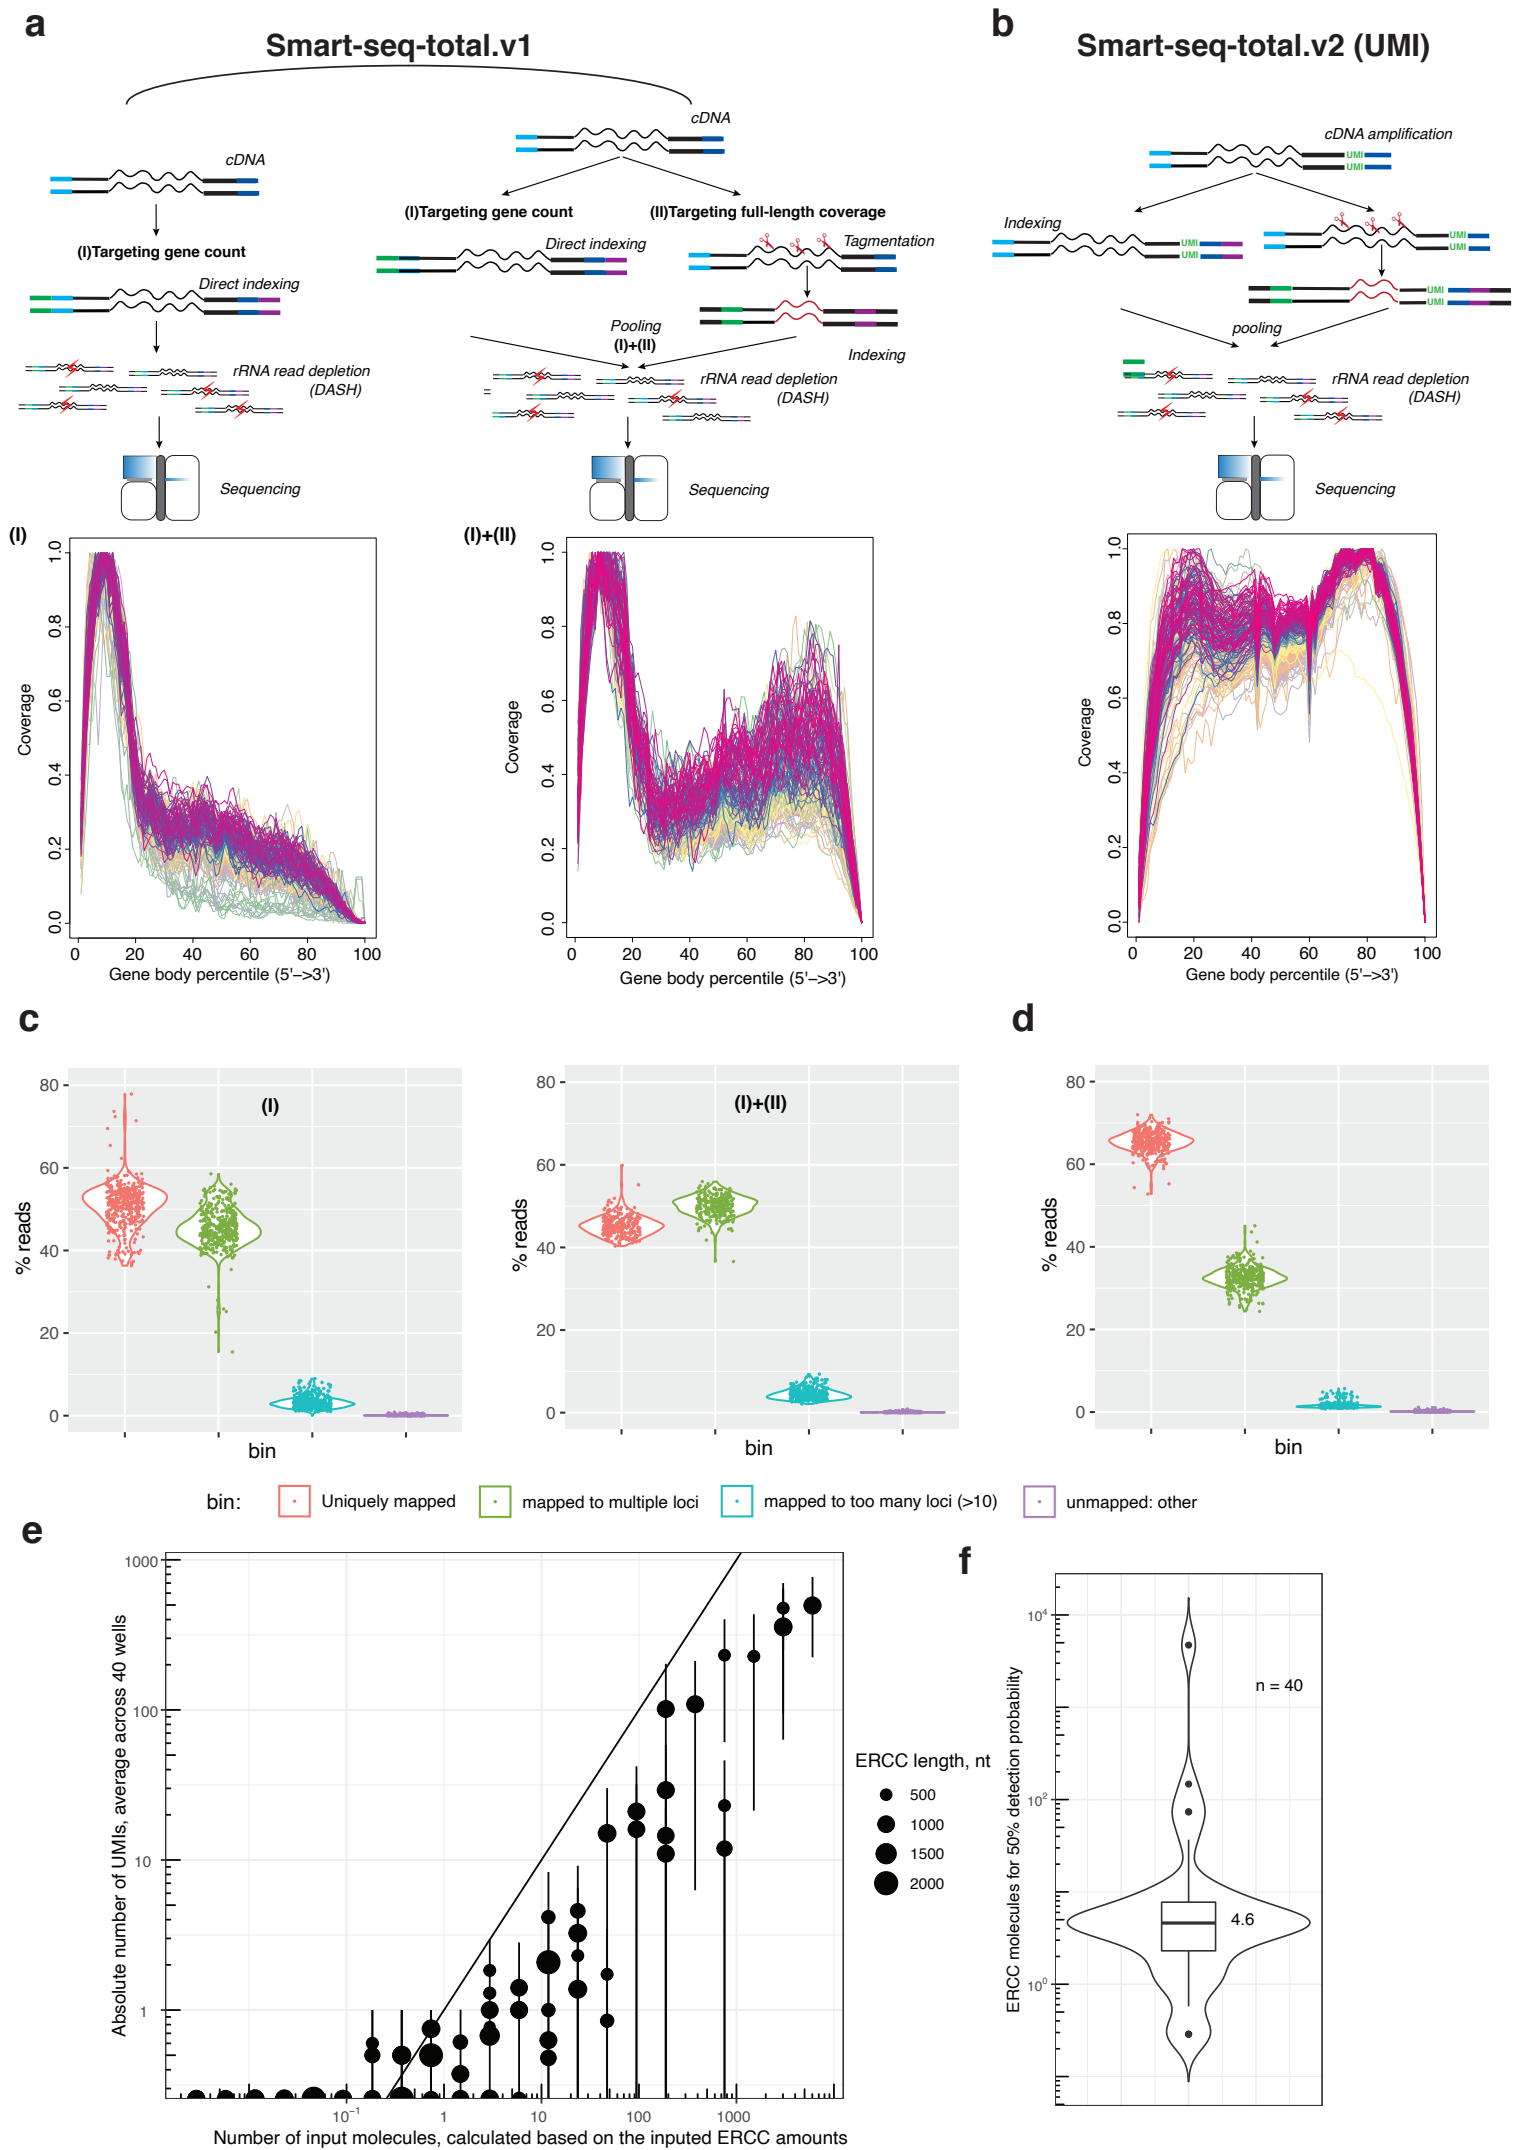

Supplementary figure 4

**a**

|                       | Smart-seq-total | Smart-seq2/3 | Holo-seq | SUPeR-seq | MATQ-seq |
|-----------------------|-----------------|--------------|----------|-----------|----------|
| mRNA                  | ✓               | ✓            | ✓        | ✓         | ✓        |
| Small non-coding RNA  | ✓               |              | ✓        |           |          |
| Long polyA devoid RNA | ✓               |              | ✓        | ✓         | ✓        |
| Full-length cDNA      | ✓               | ✓            |          |           | ✓        |
| UMIs                  | ✓               | ✓            |          |           | ✓        |
| Scalability/Price     | ✓               | ✓            |          | ✓         | ✓        |

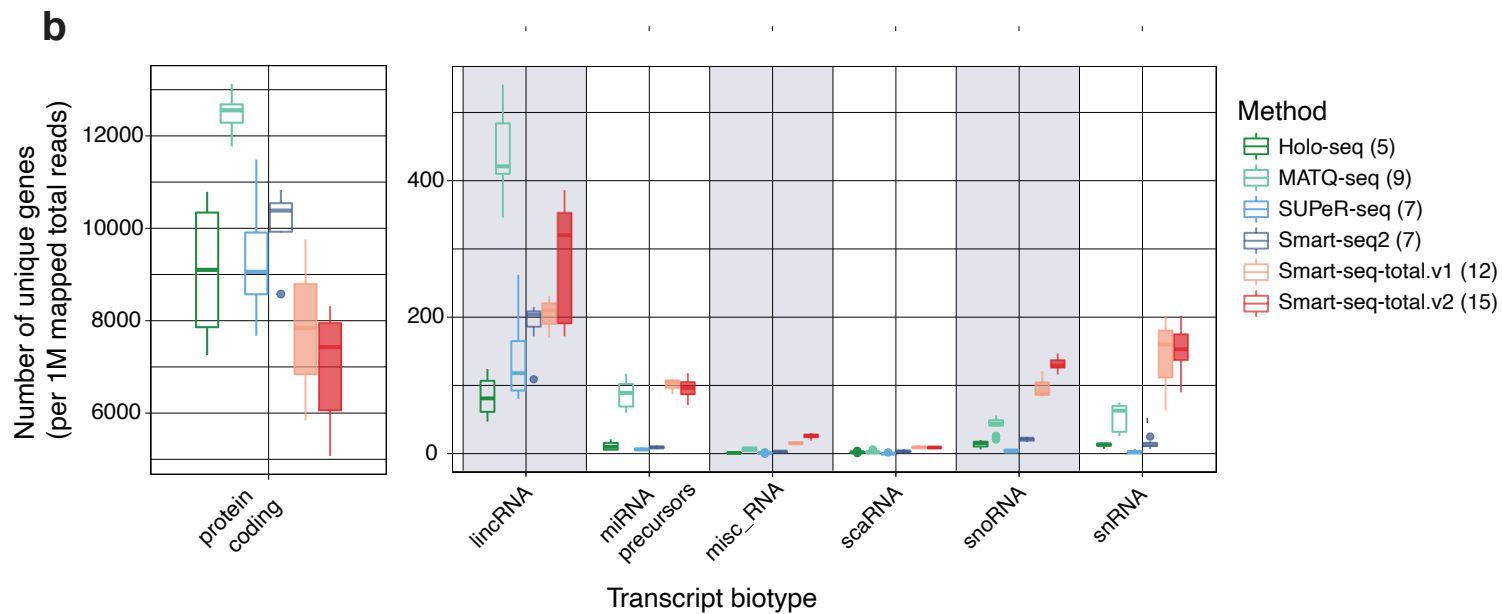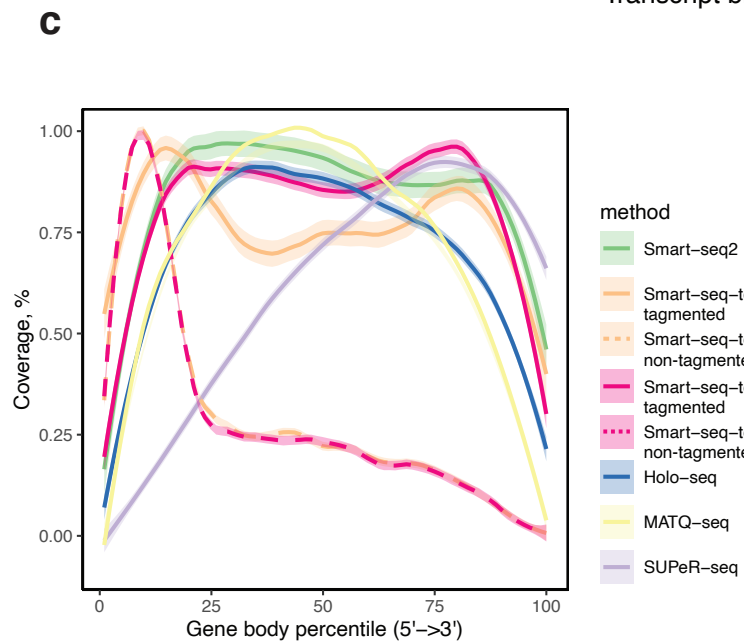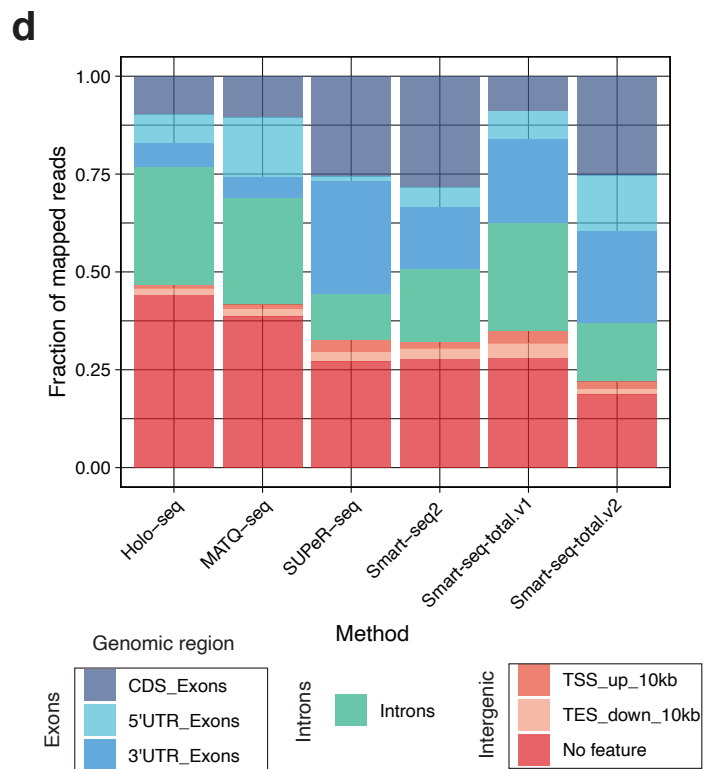

Supplementary figure 5

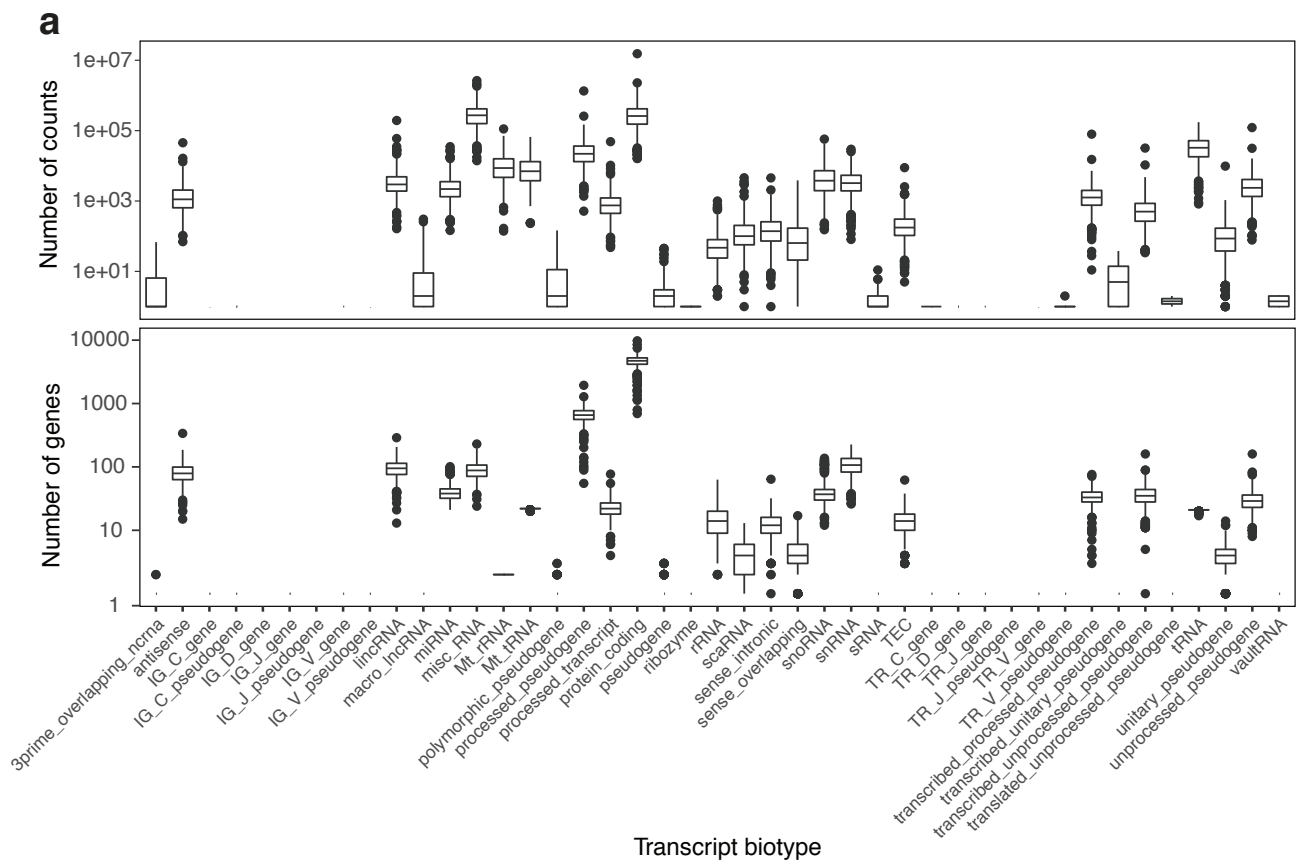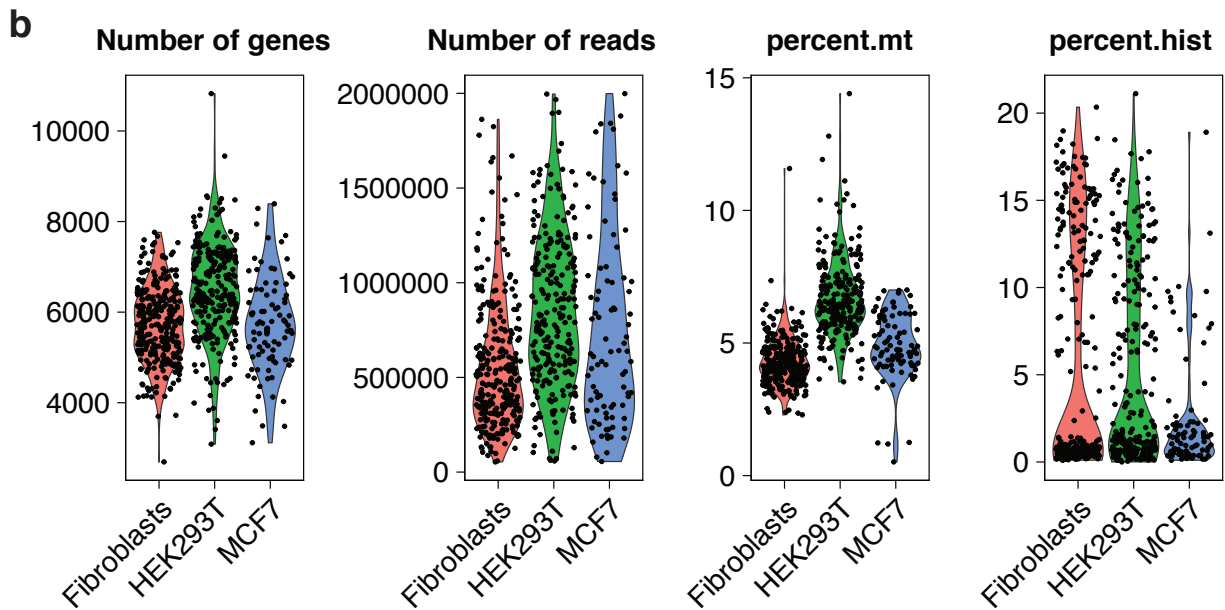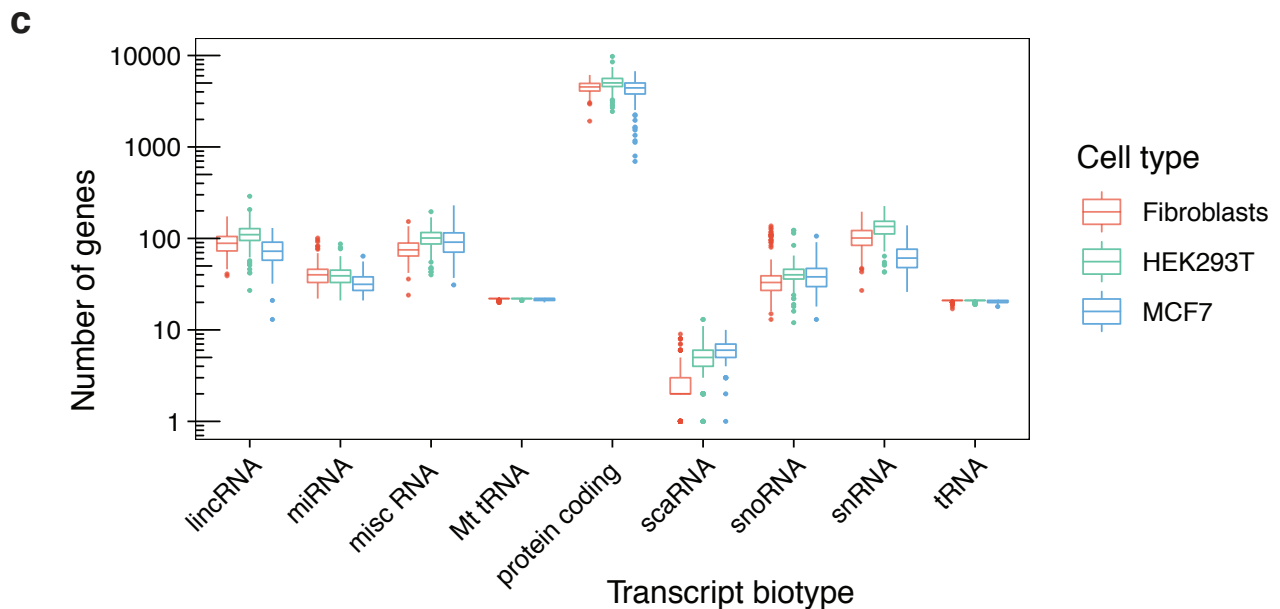

### Fibroblasts

Top 100 account for 63.8% of total

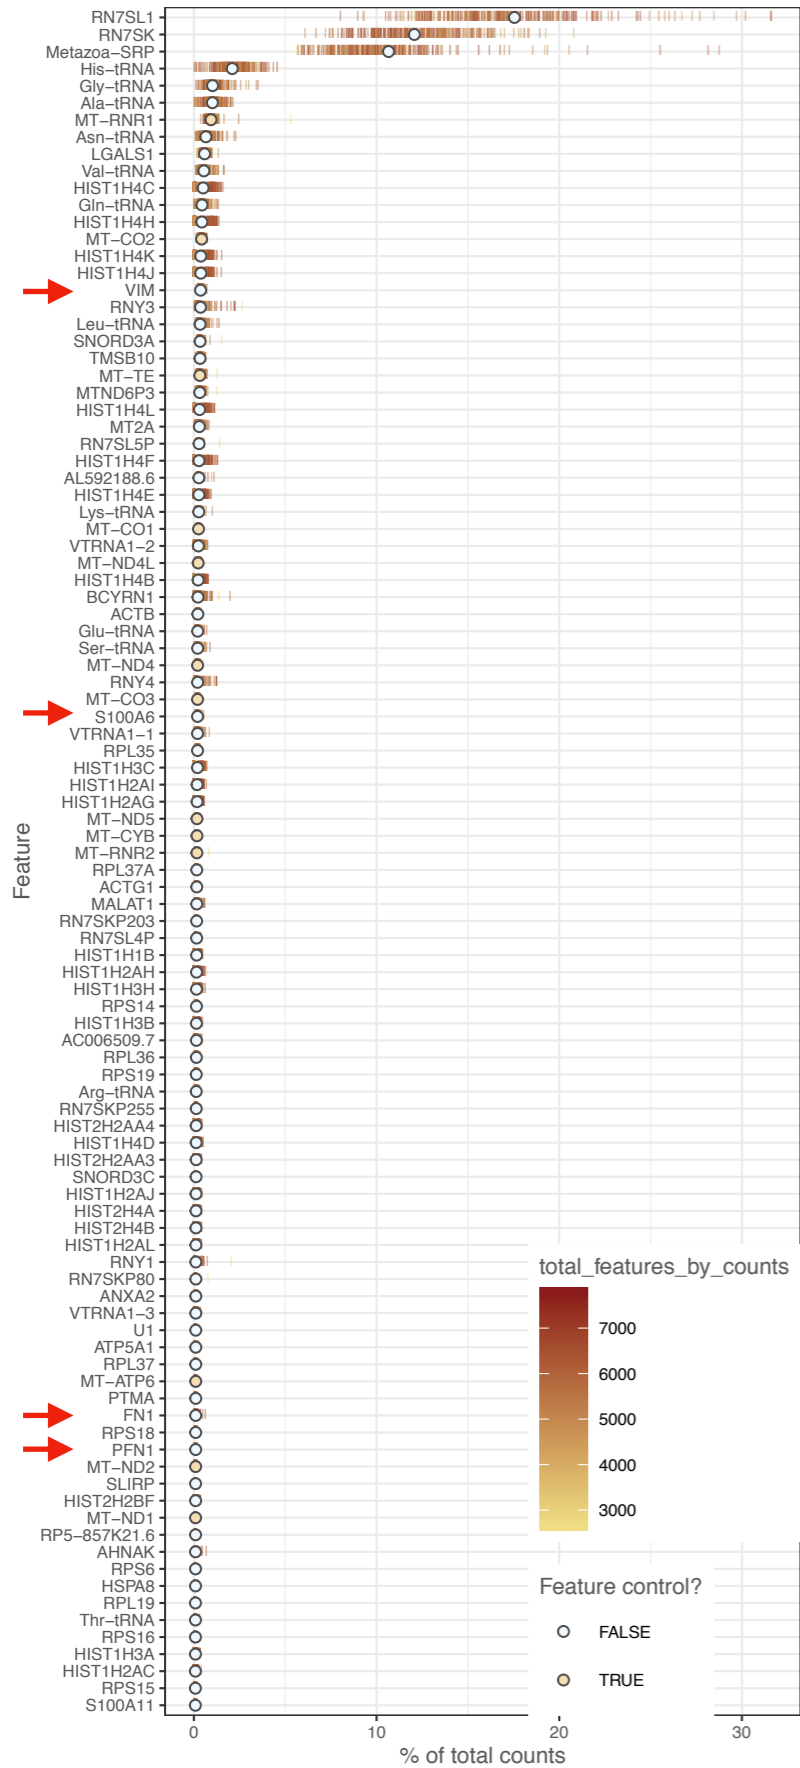

### HEK293T

Top 100 account for 60.2% of total

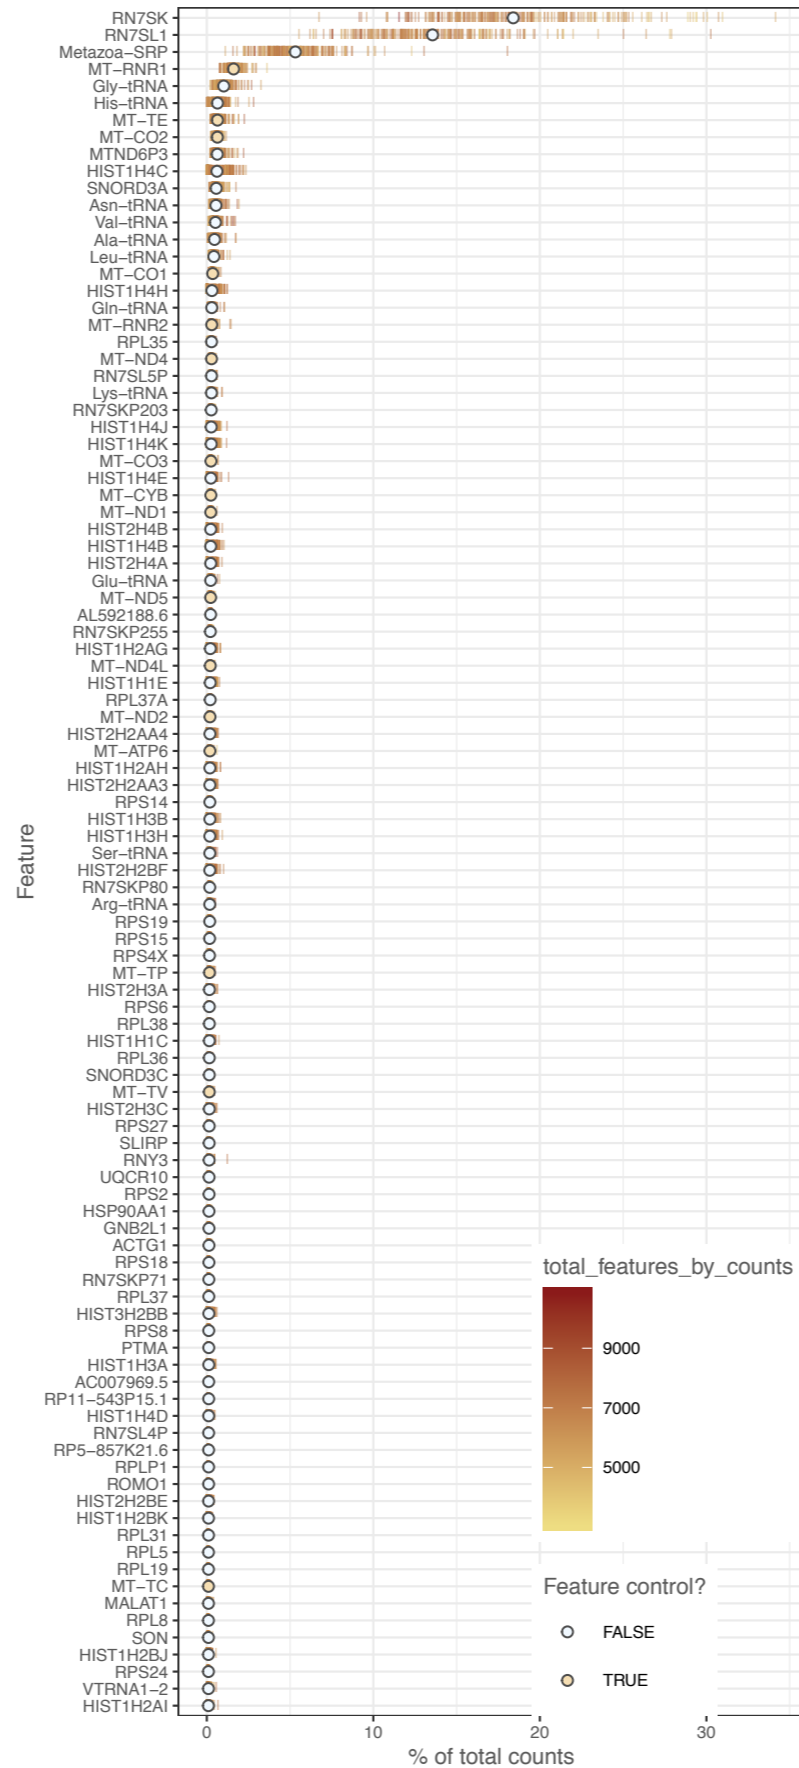

### MCF7

Top 100 account for 63.4% of total

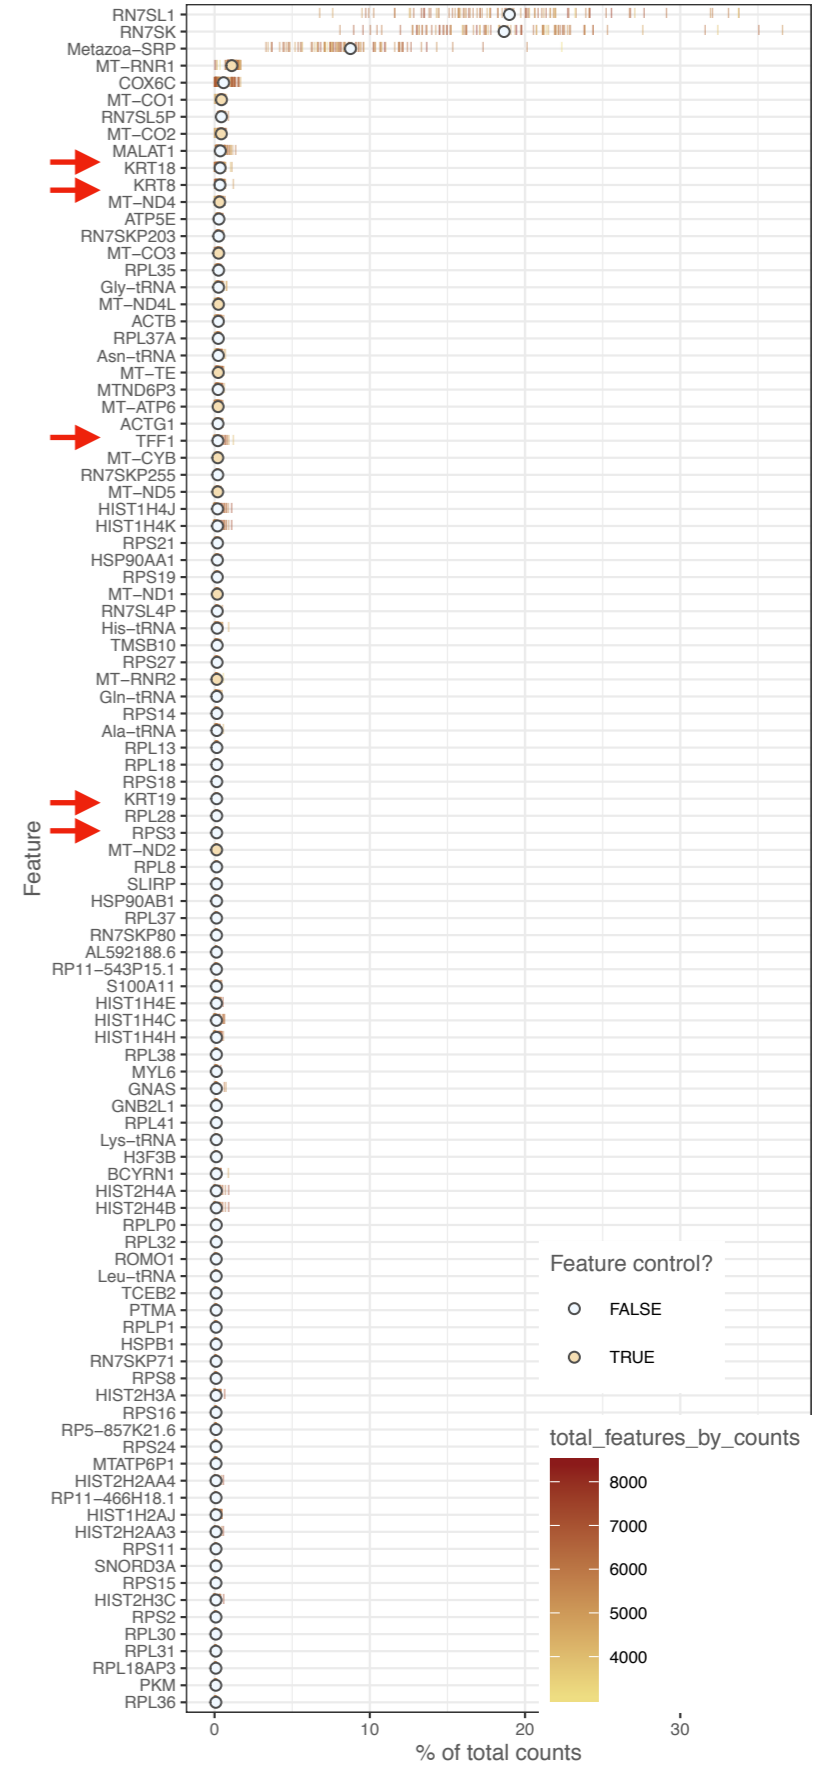

Supplementary figure 7

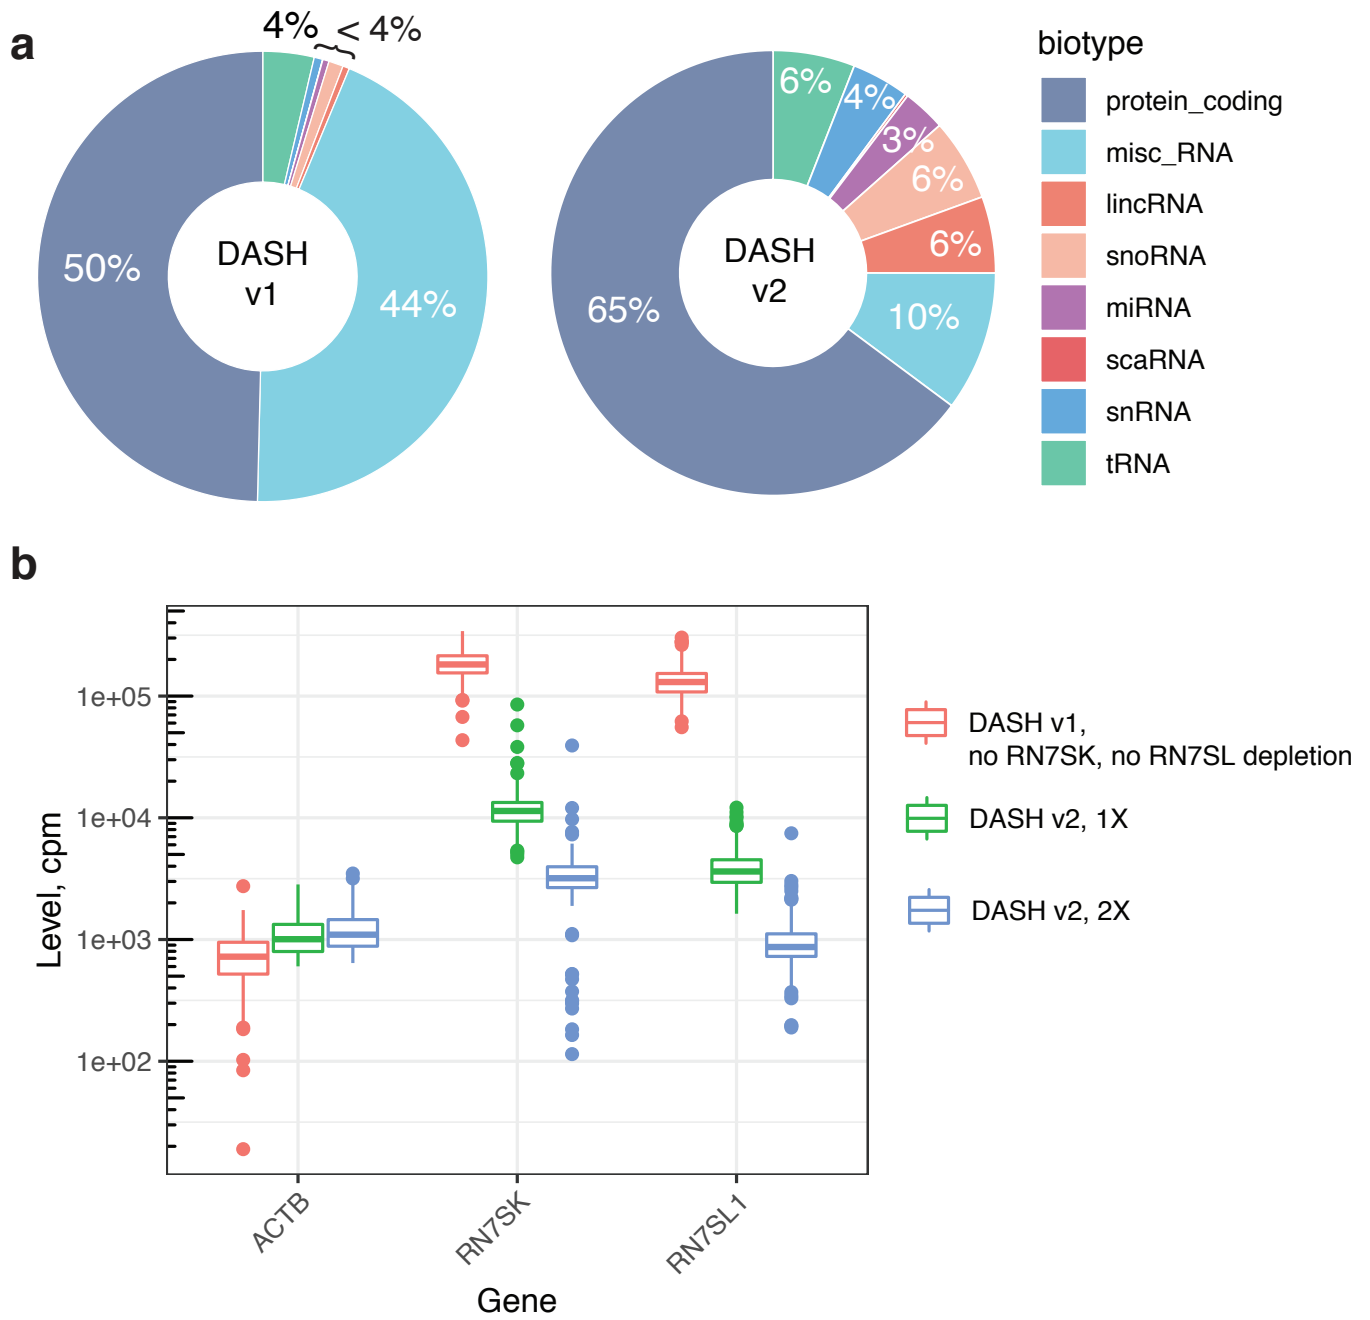



# Supplementary figure 9

Dermal fibroblasts

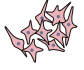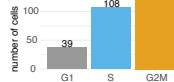

Cell cycle phase

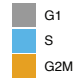

miRNA

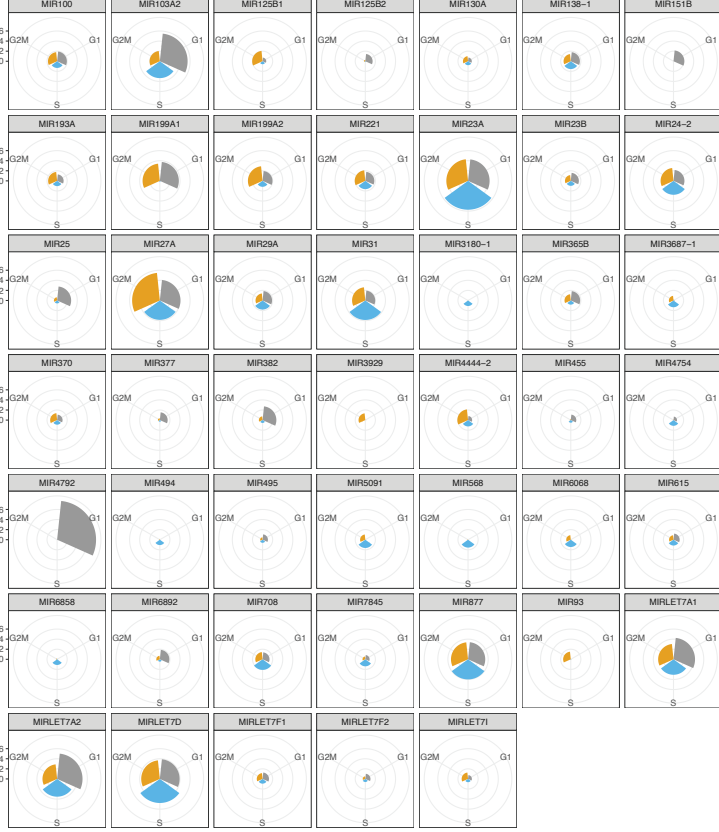

antisense

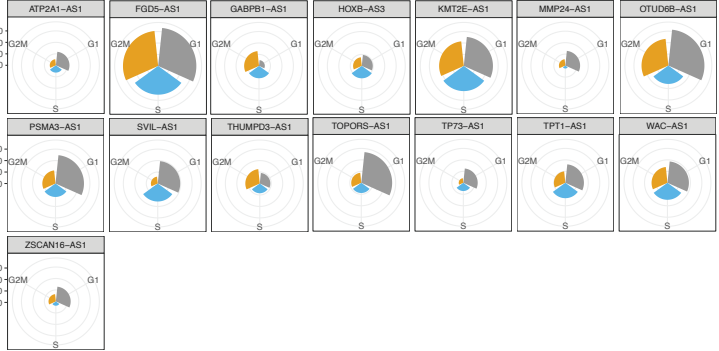

misc\_rna

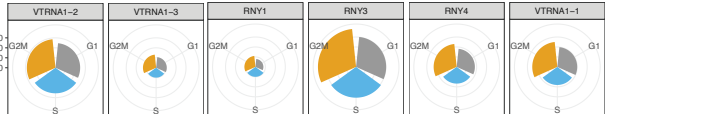

lincRNA

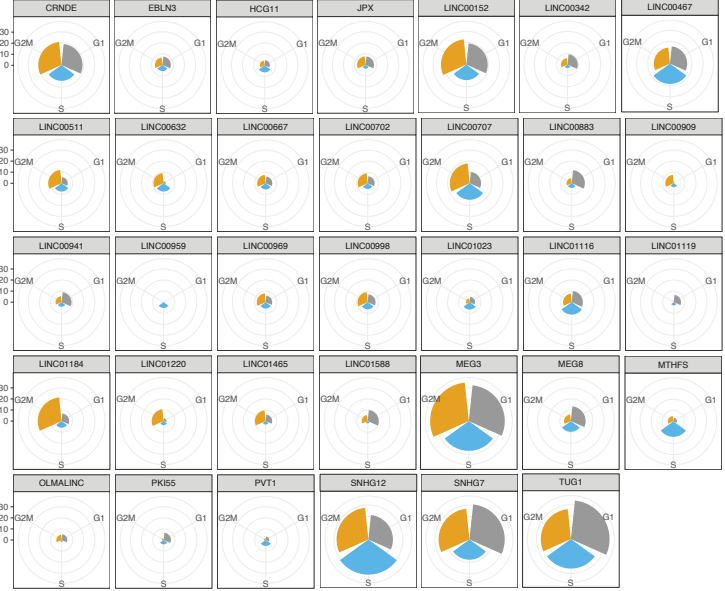

snRNA

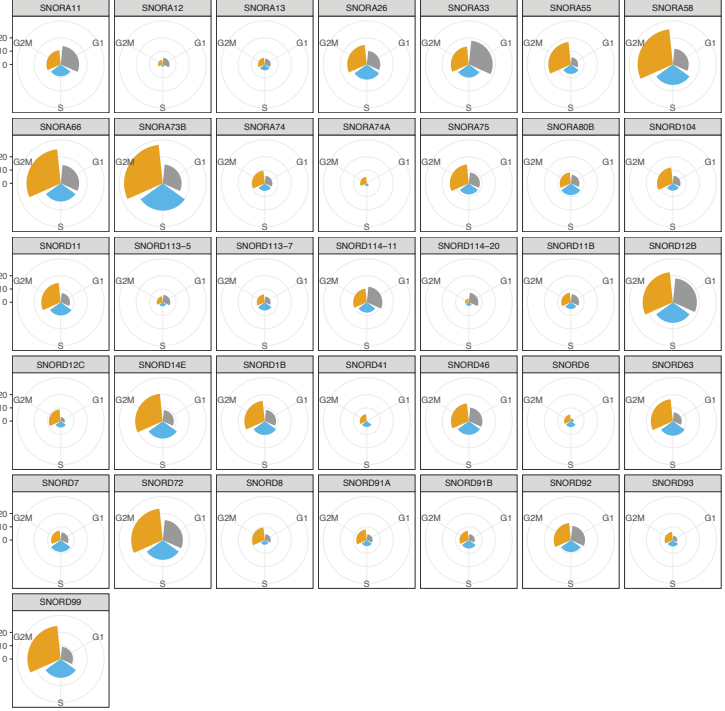

snRNA

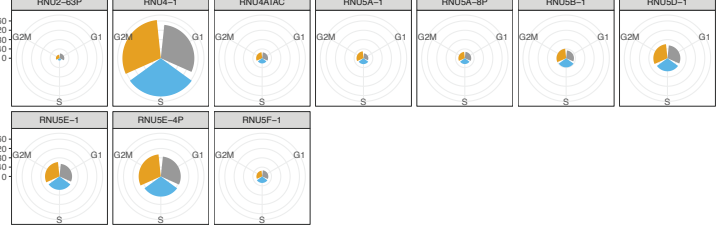

Average expression, ln(cpm+1)



# Supplementary figure 10

HEK293T

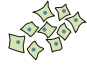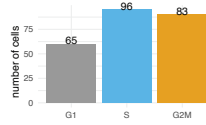

Cell cycle phase

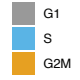

miRNA

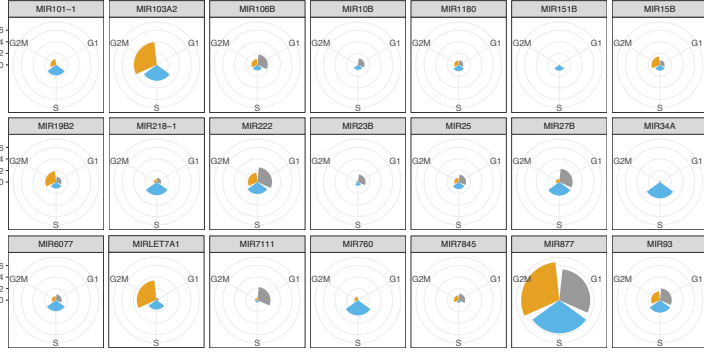

antisense

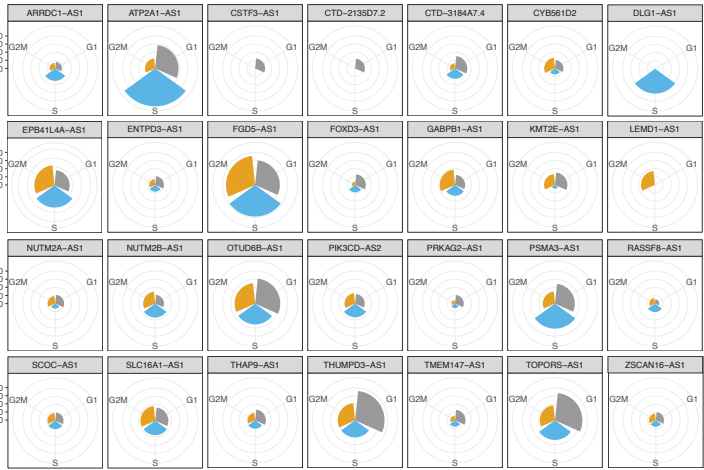

snRNA

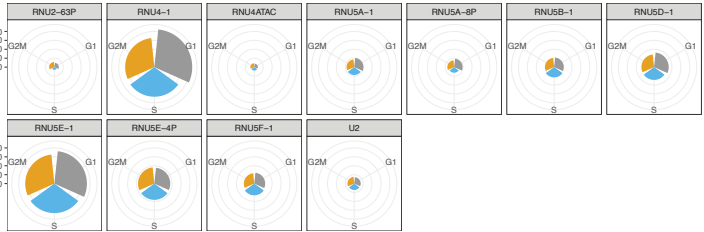

lincRNA

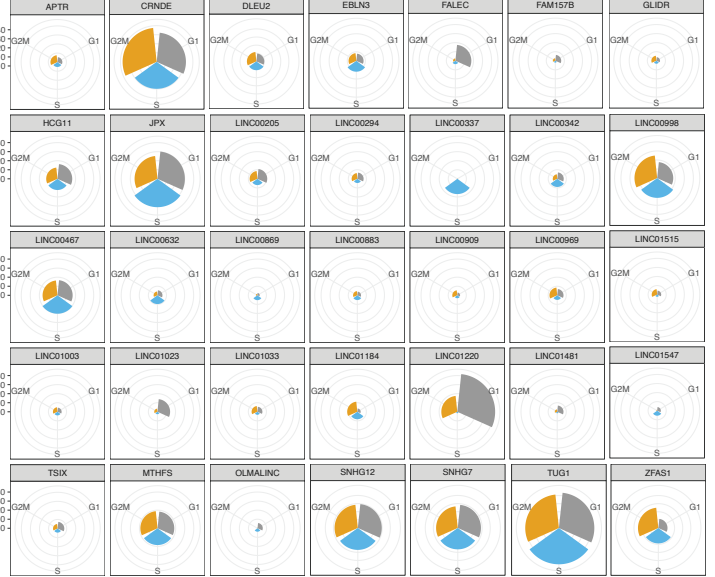

snoRNA

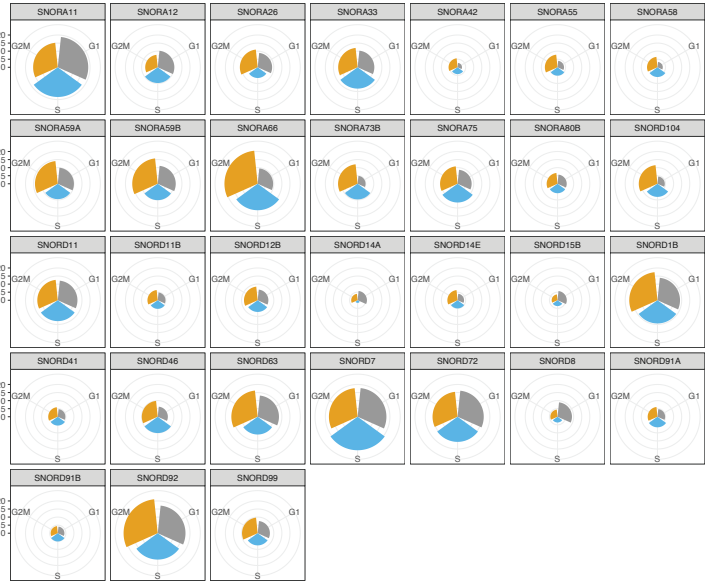

misc\_RNA

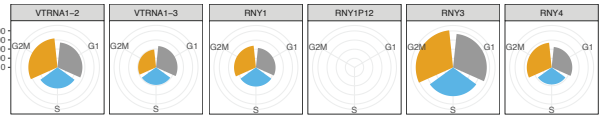

Average expression, ln(cpm+1)



# Supplementary figure 11

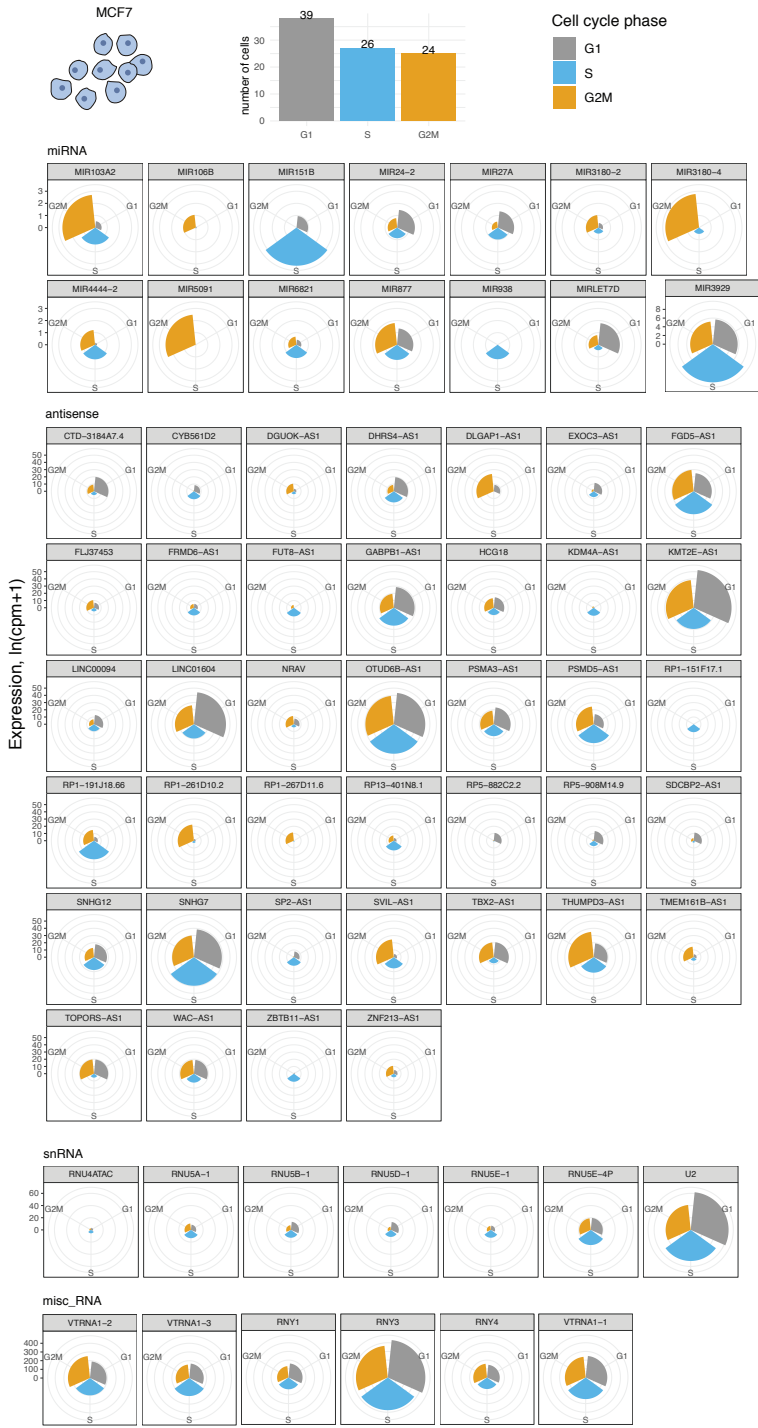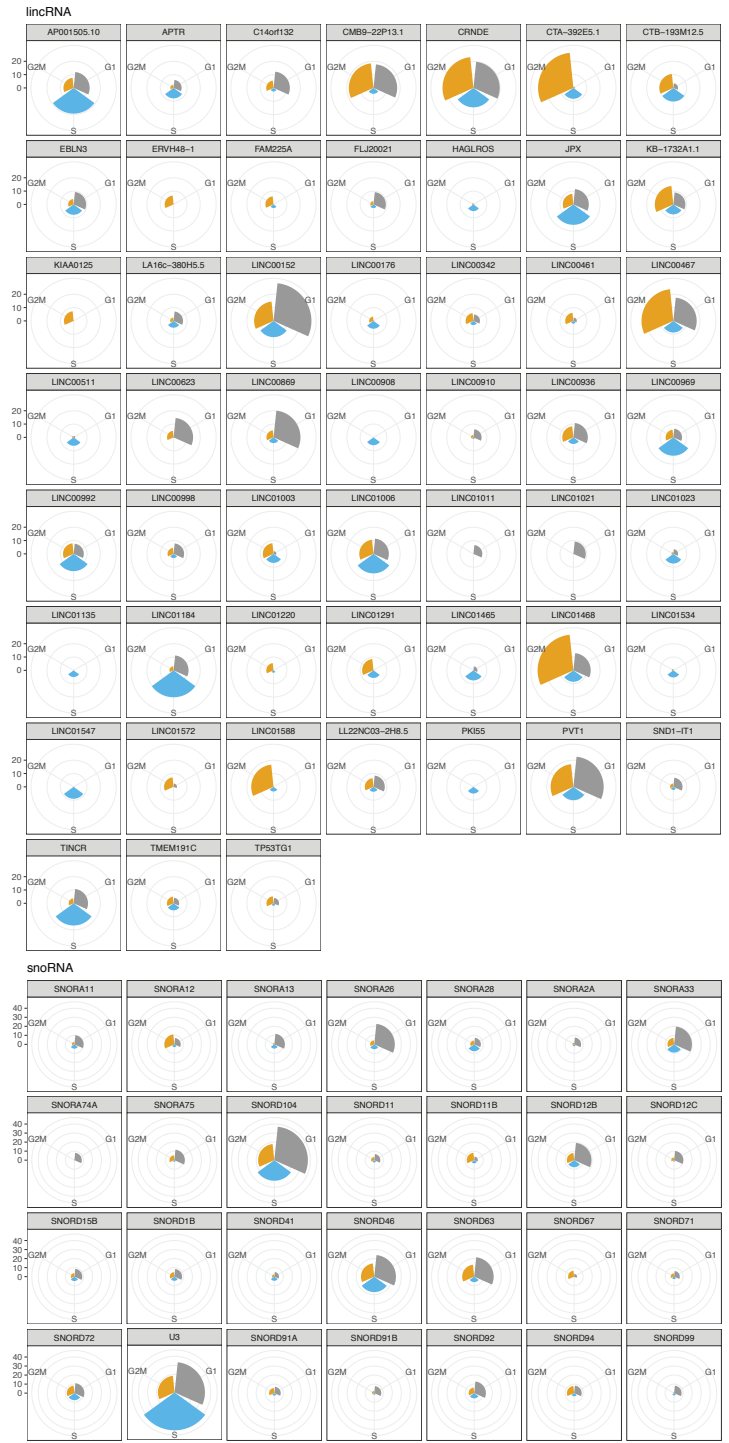

Supplementary figure 12

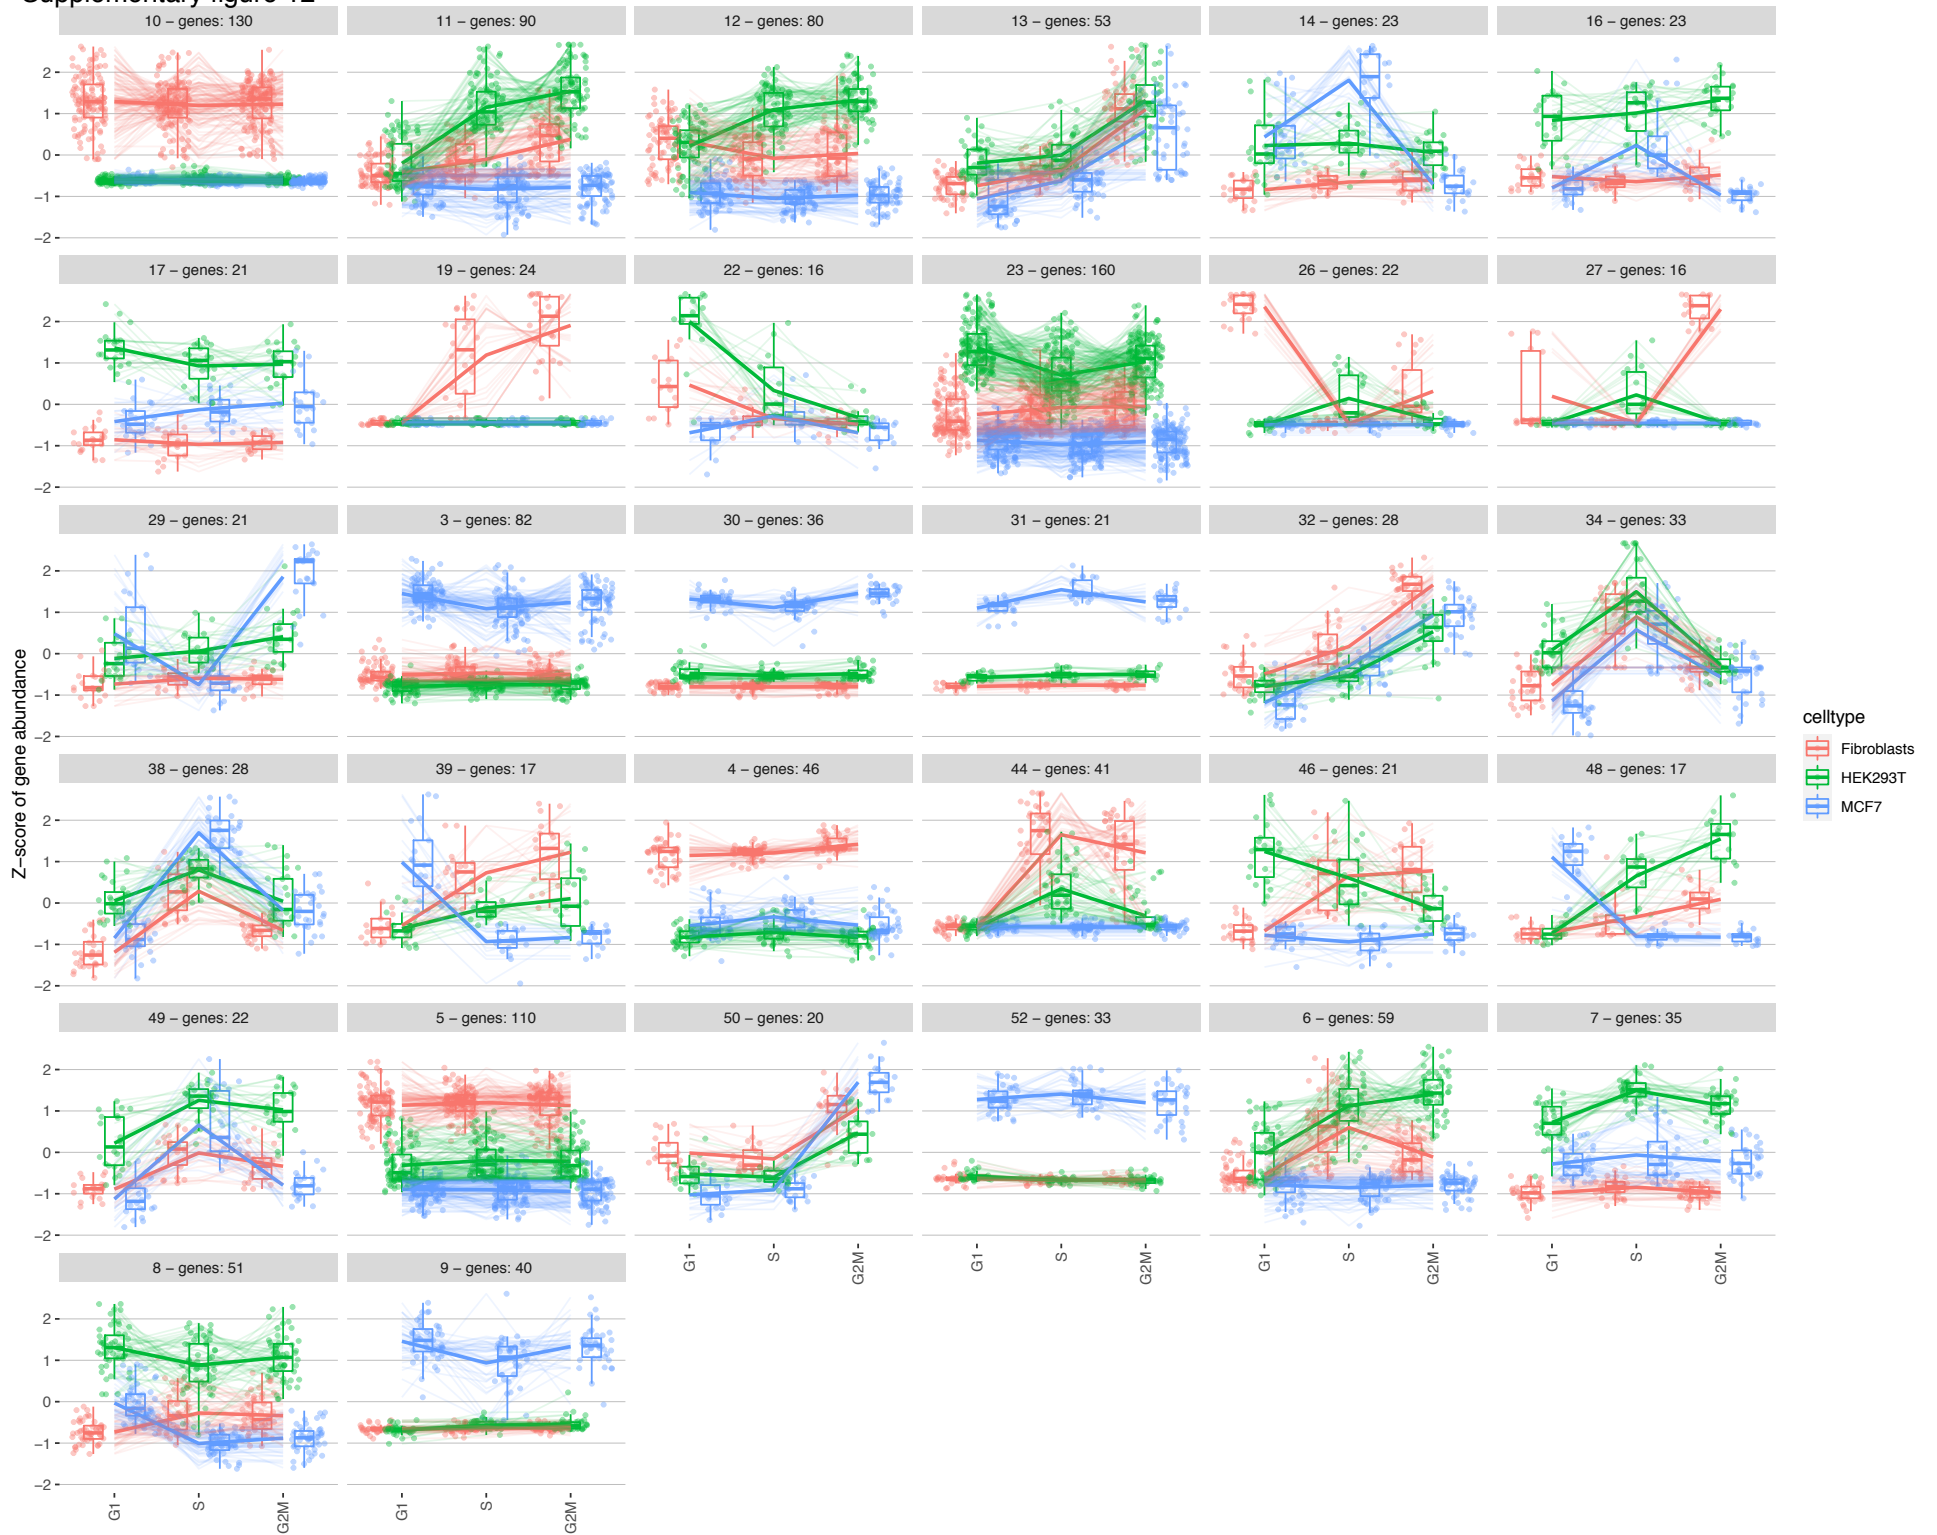

Supplementary figure 13

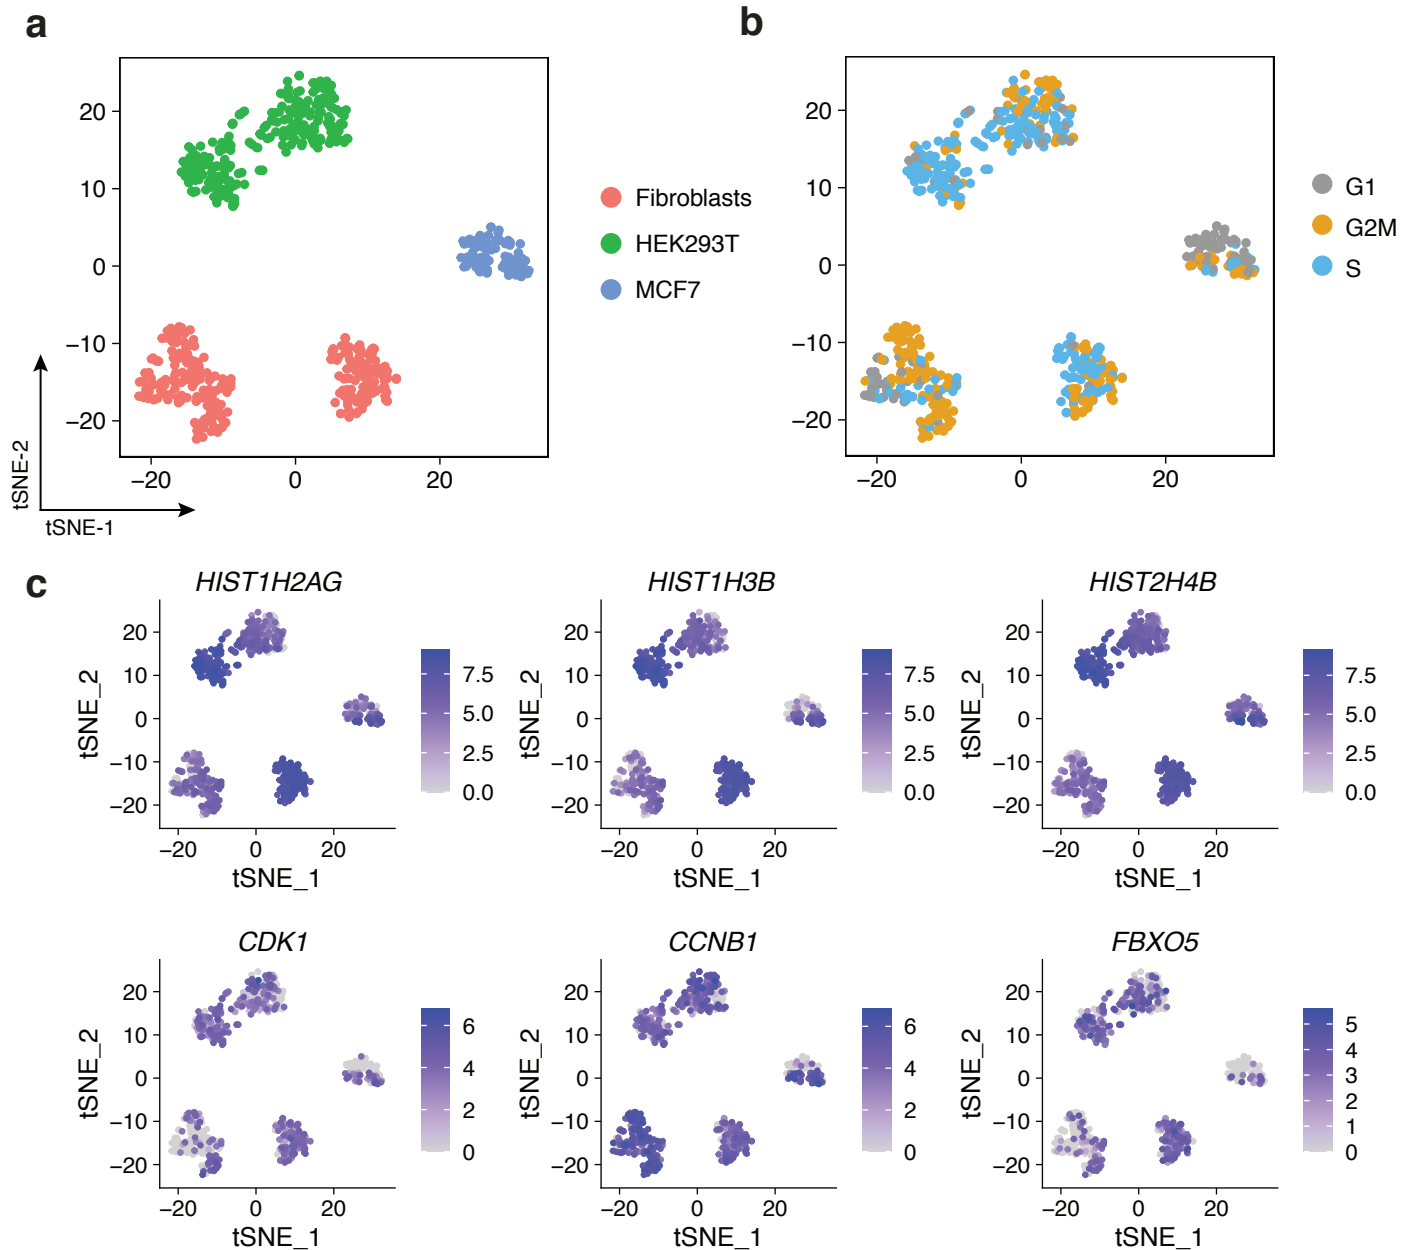

# Supplementary figure 14

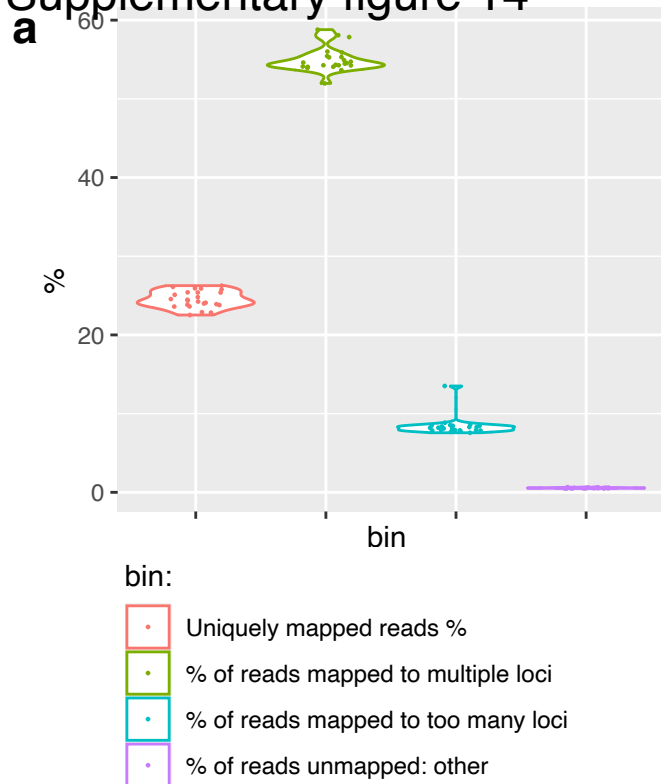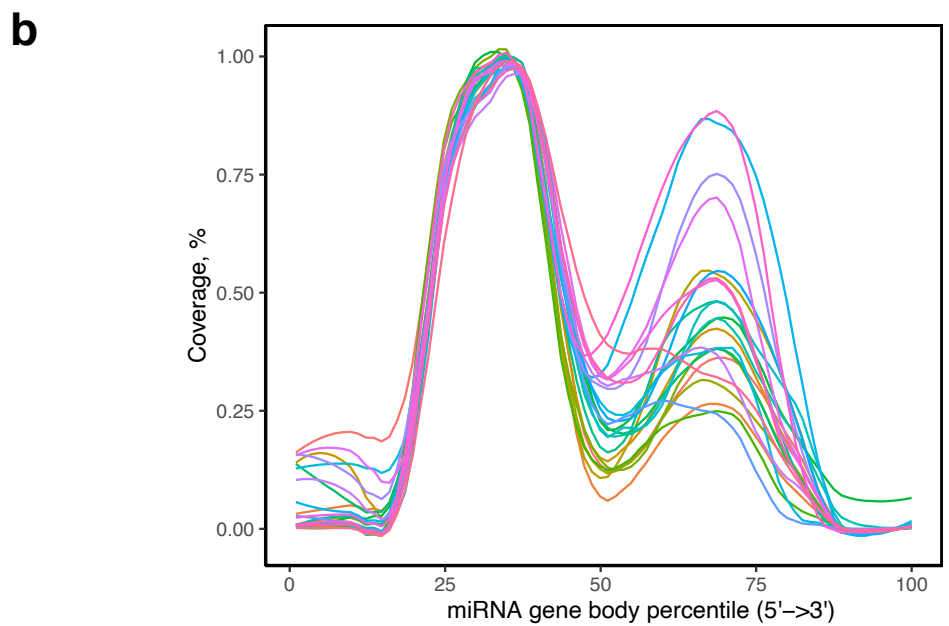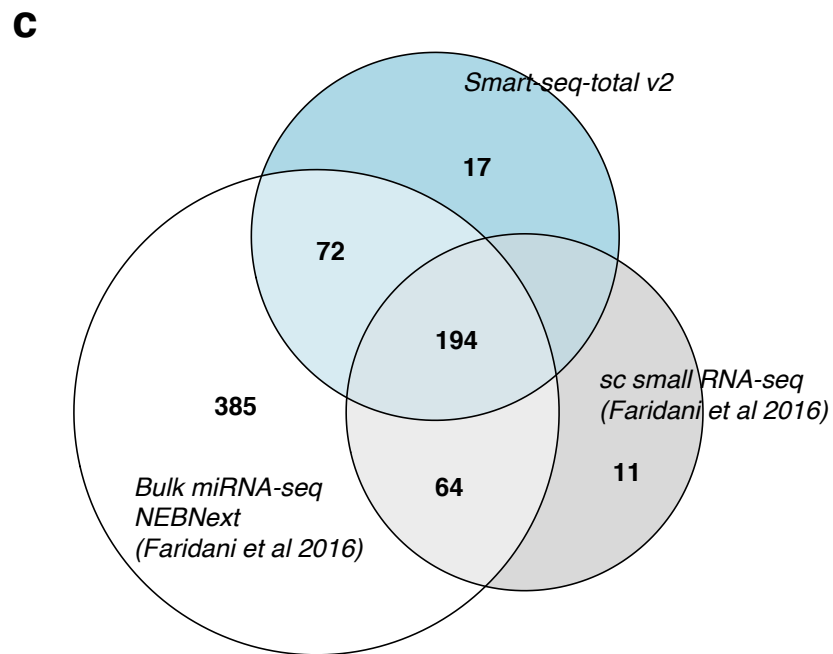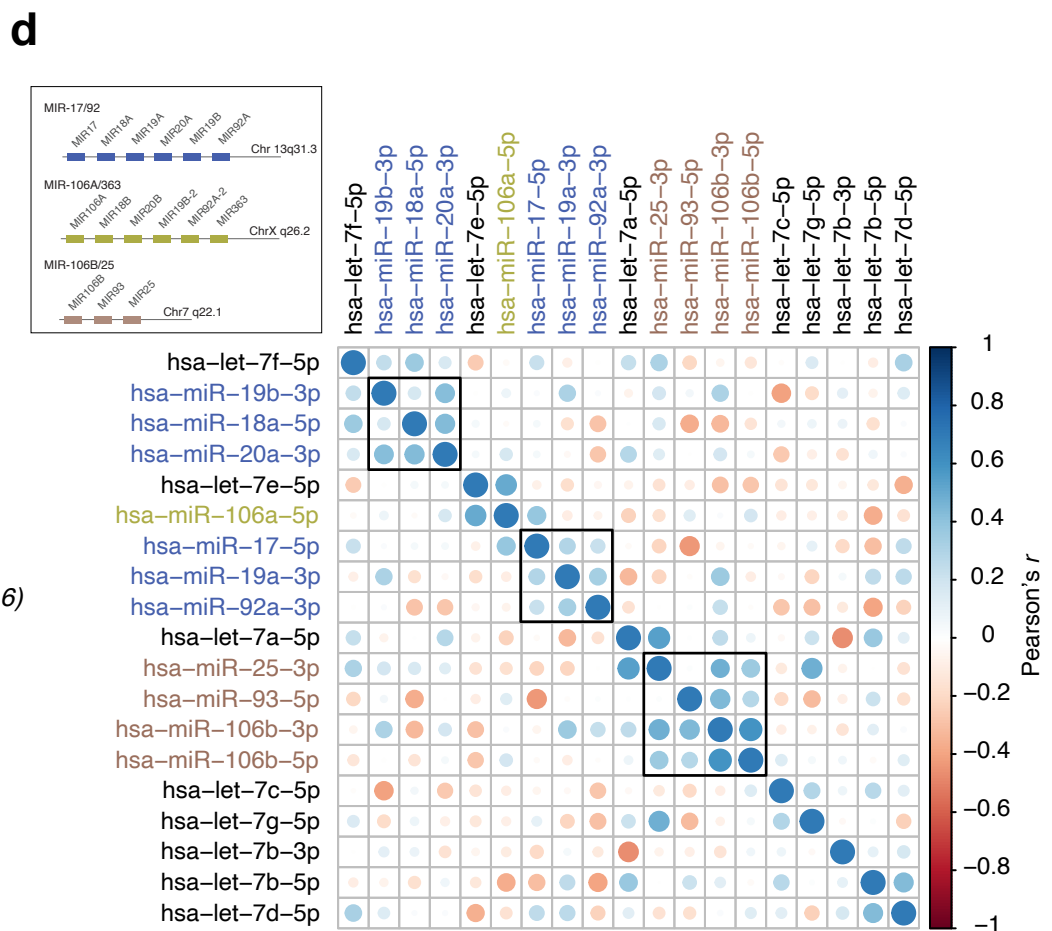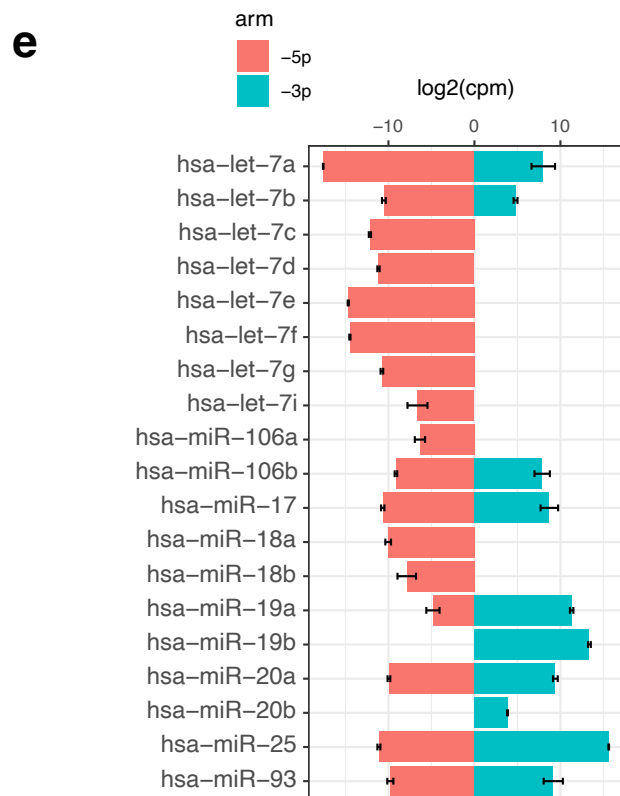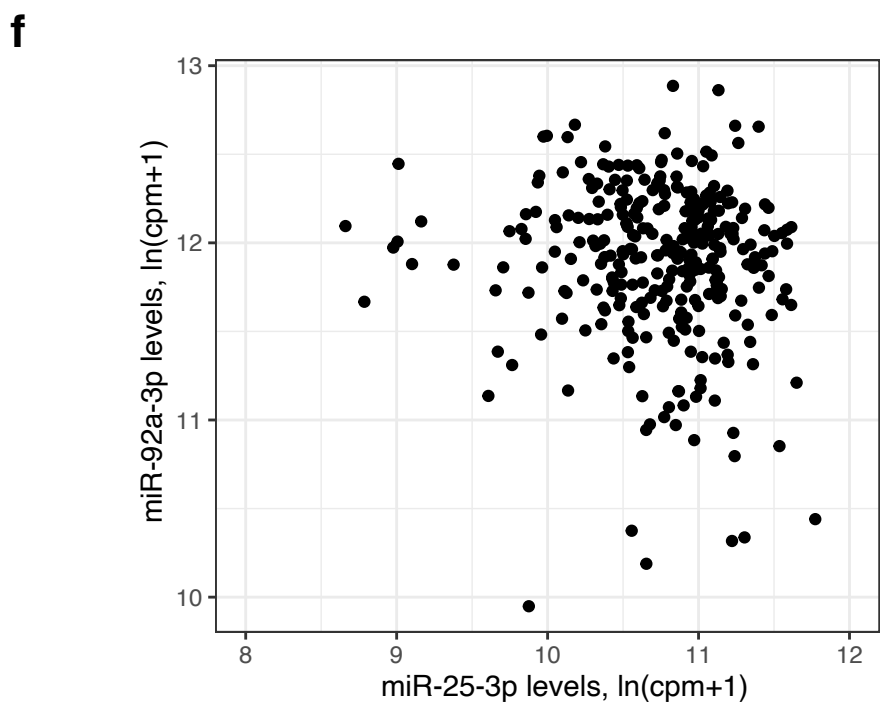



# Supplementary figure 15

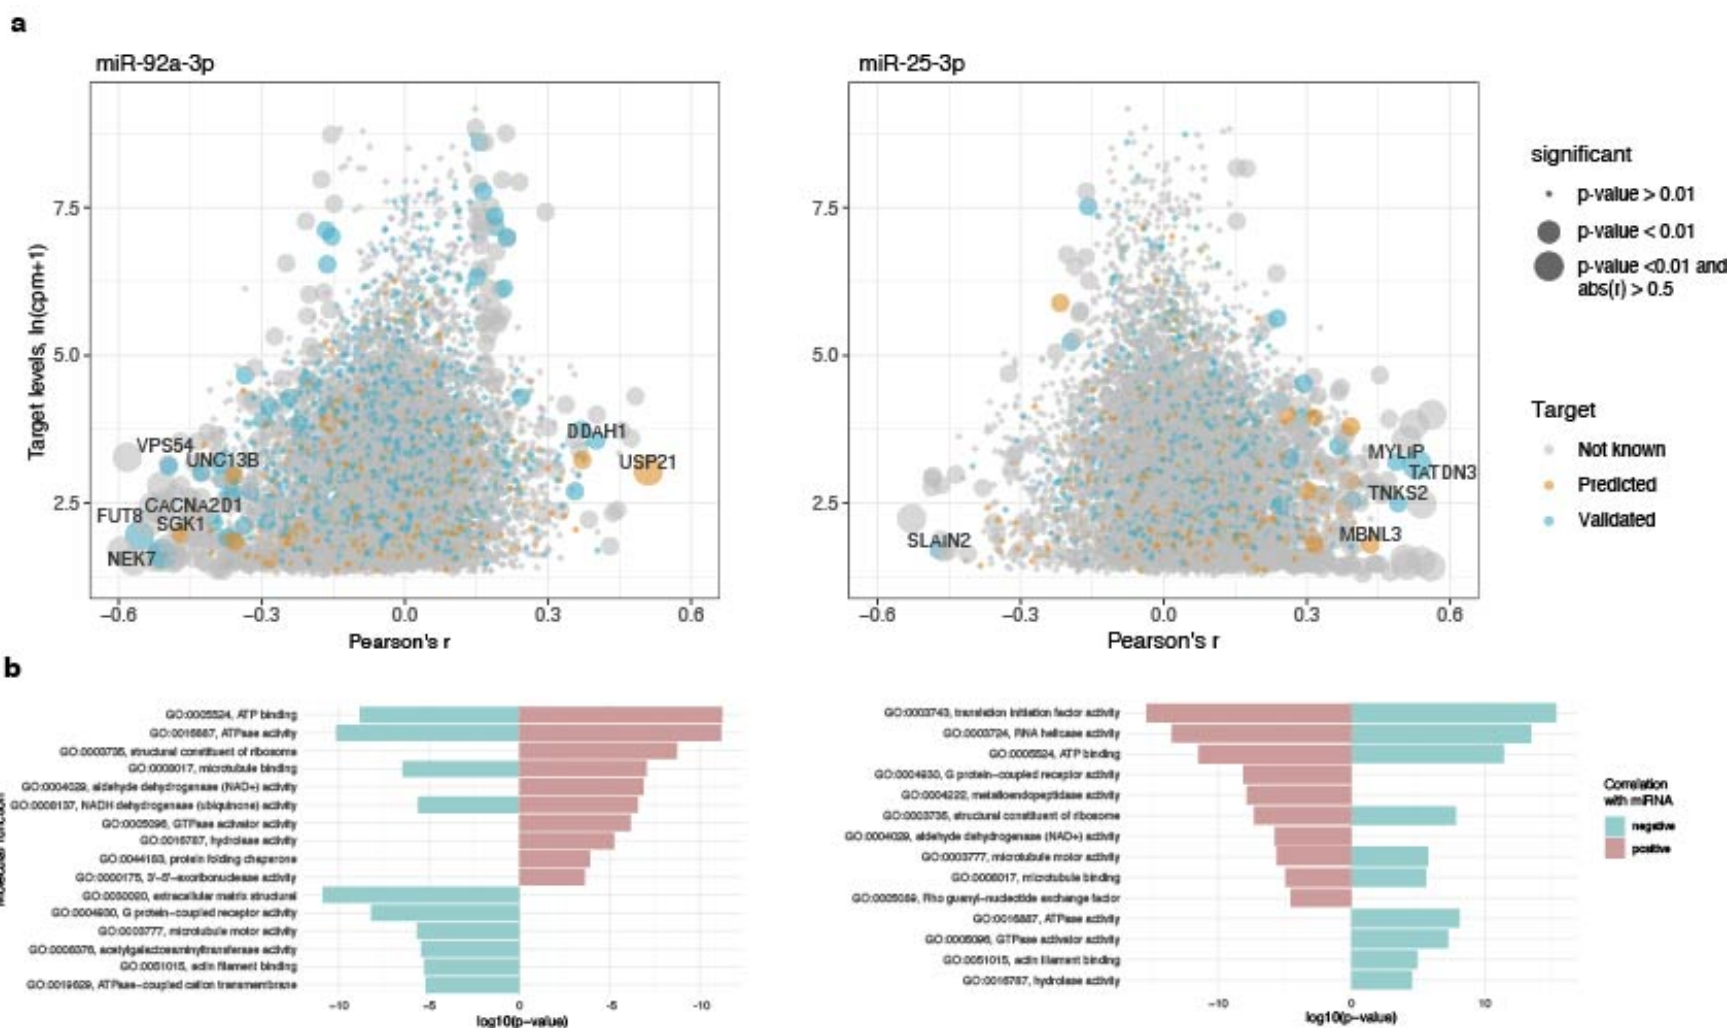

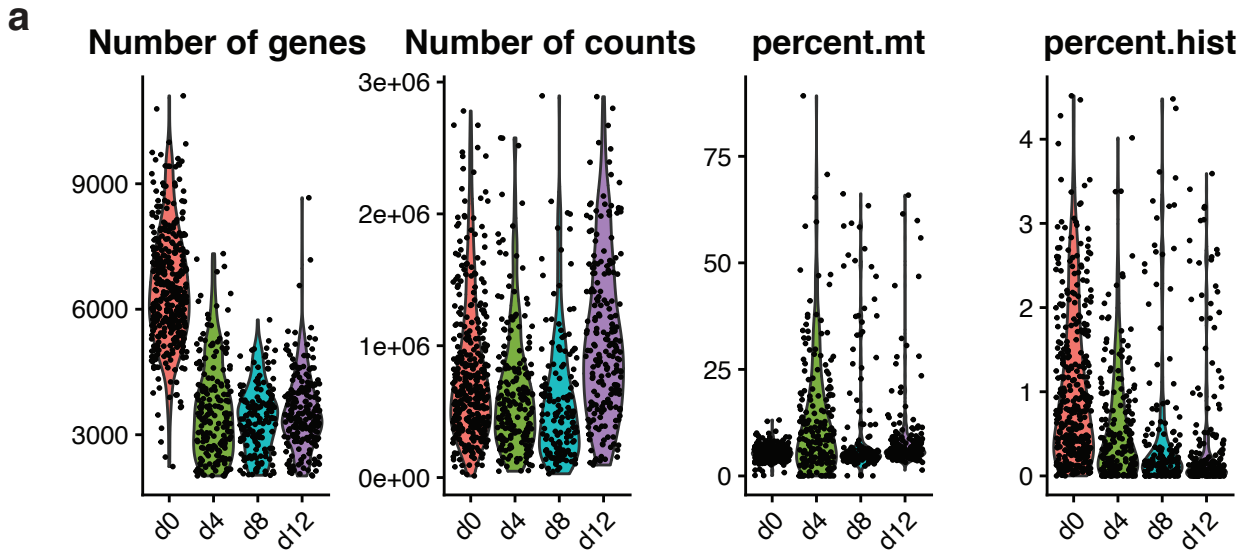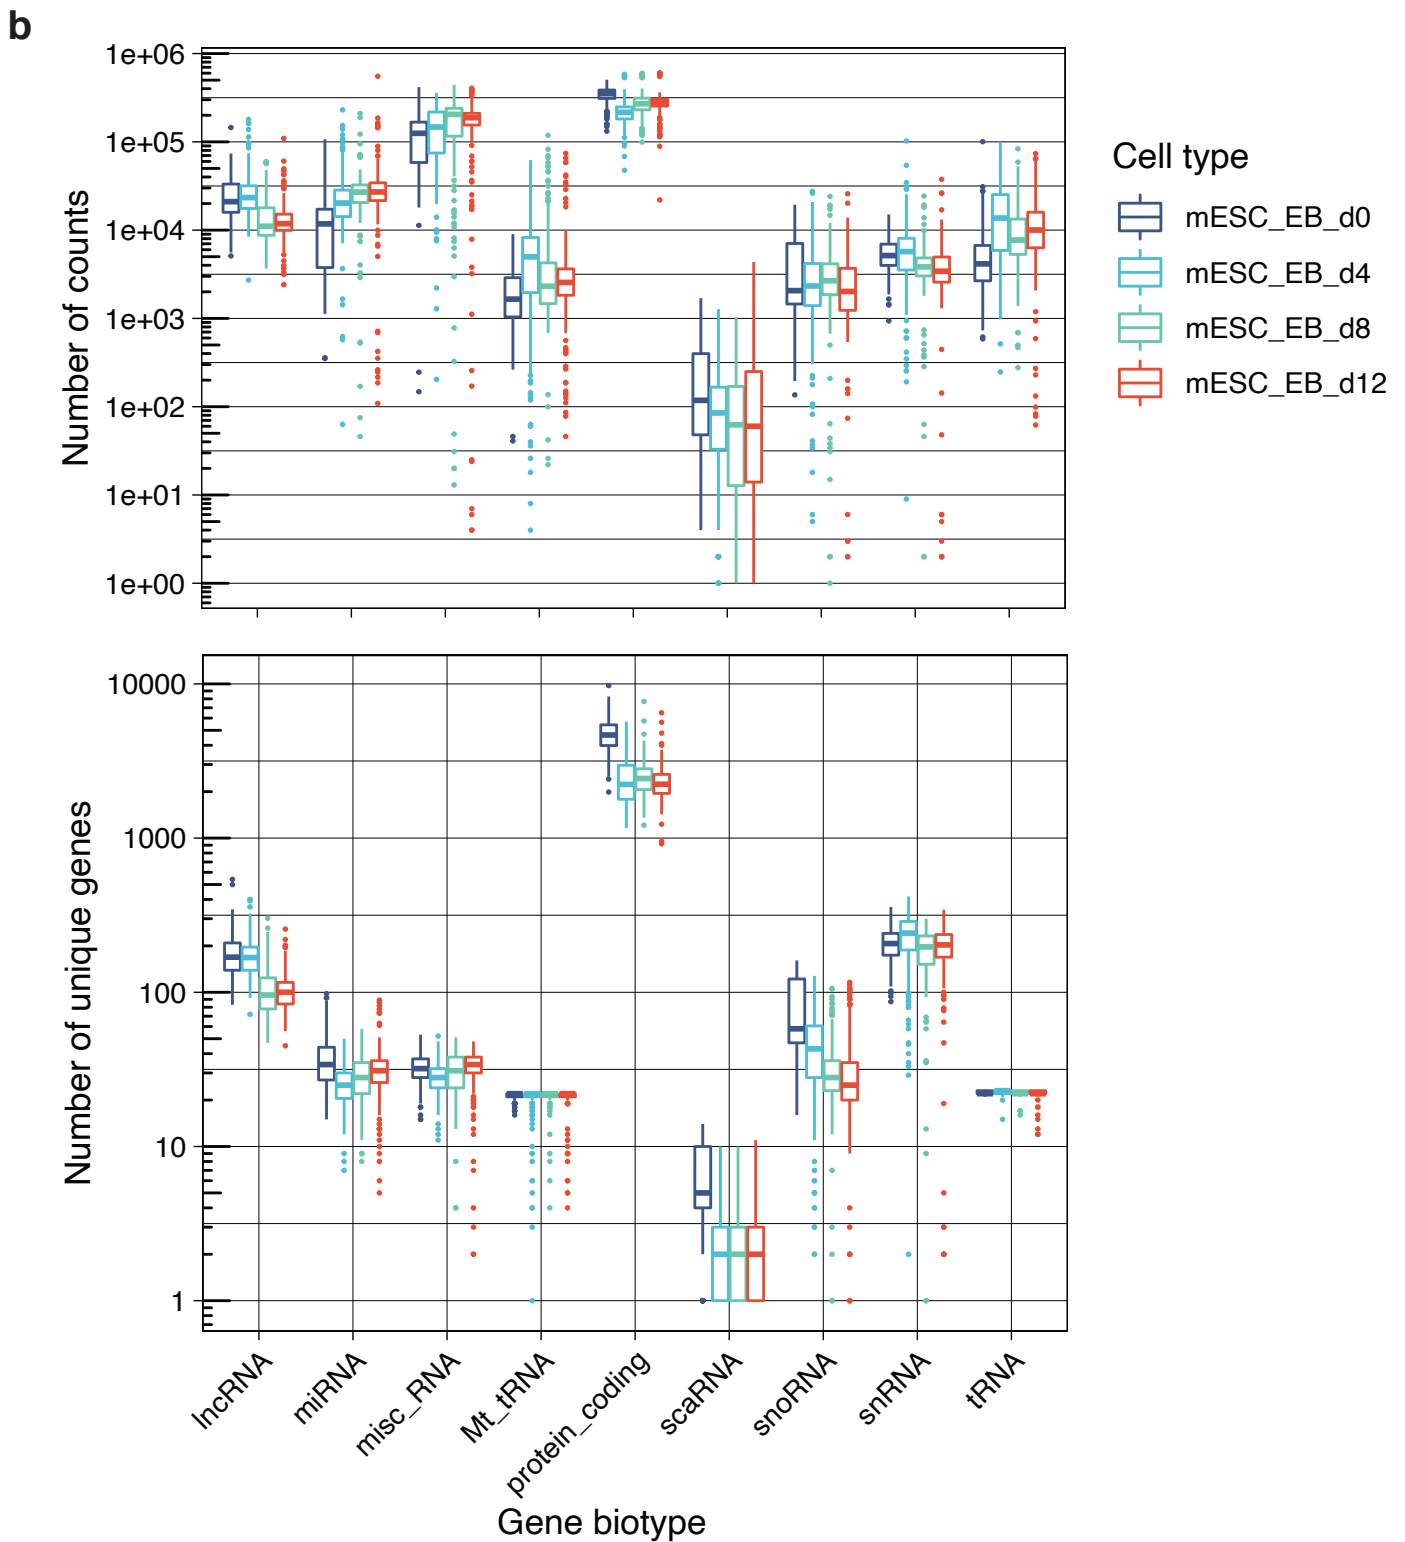

Supplementary figure 17

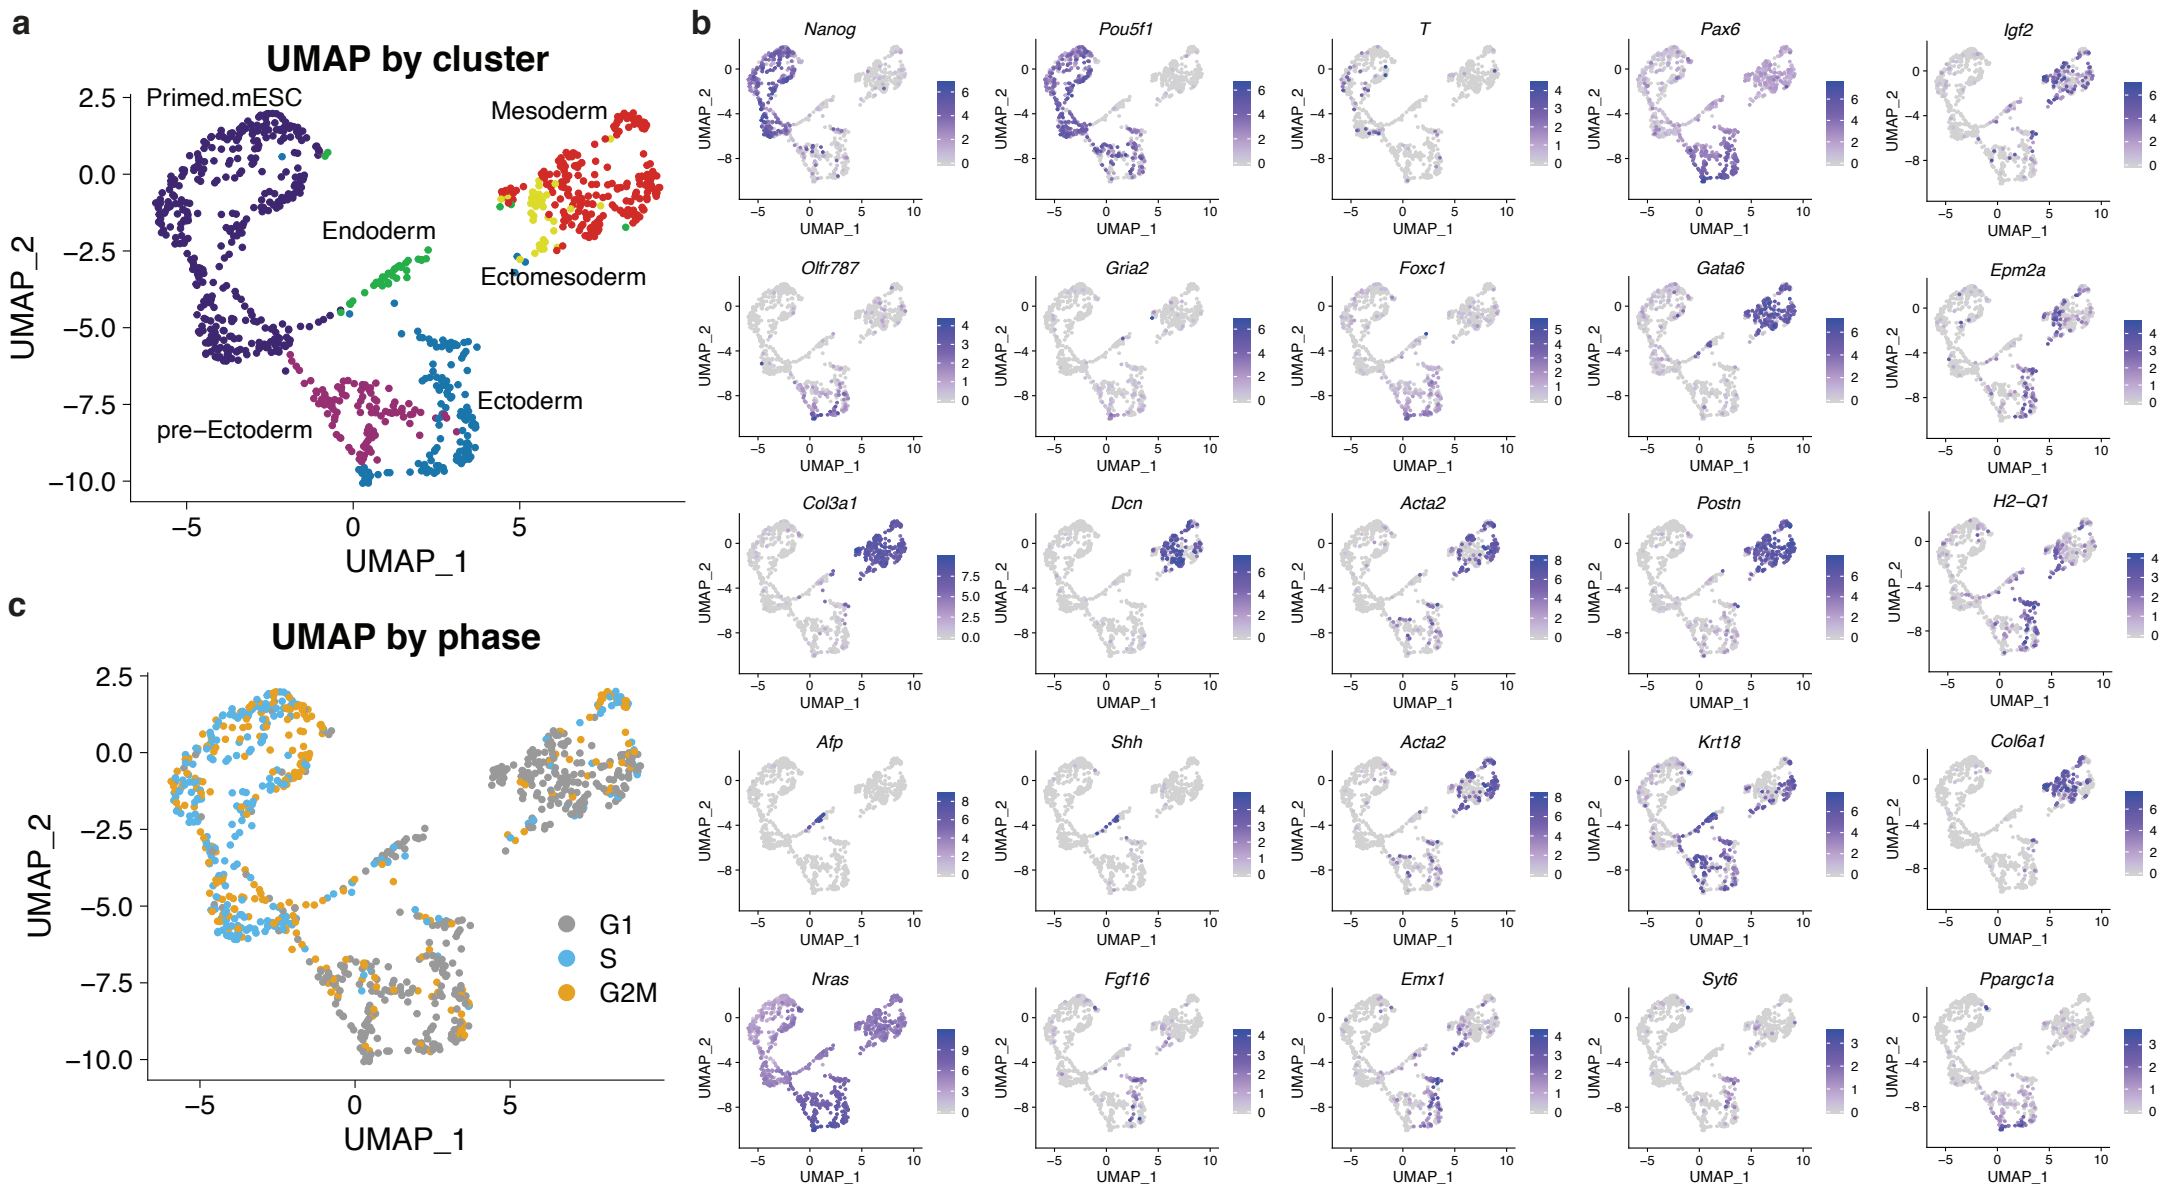





**a**

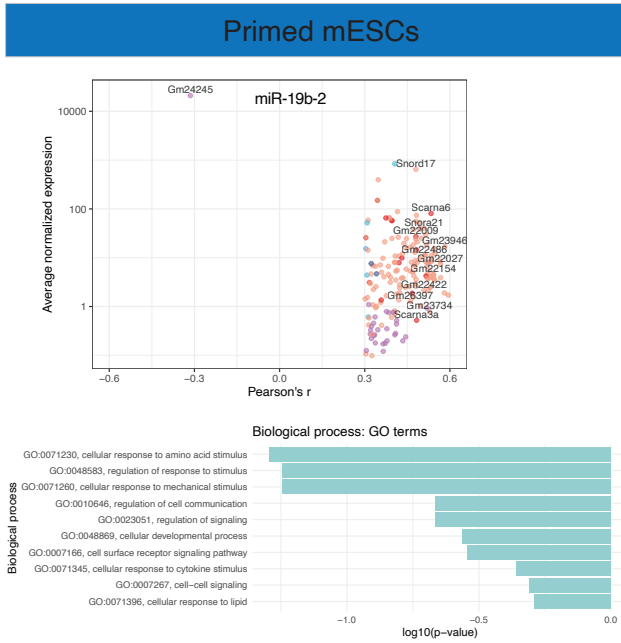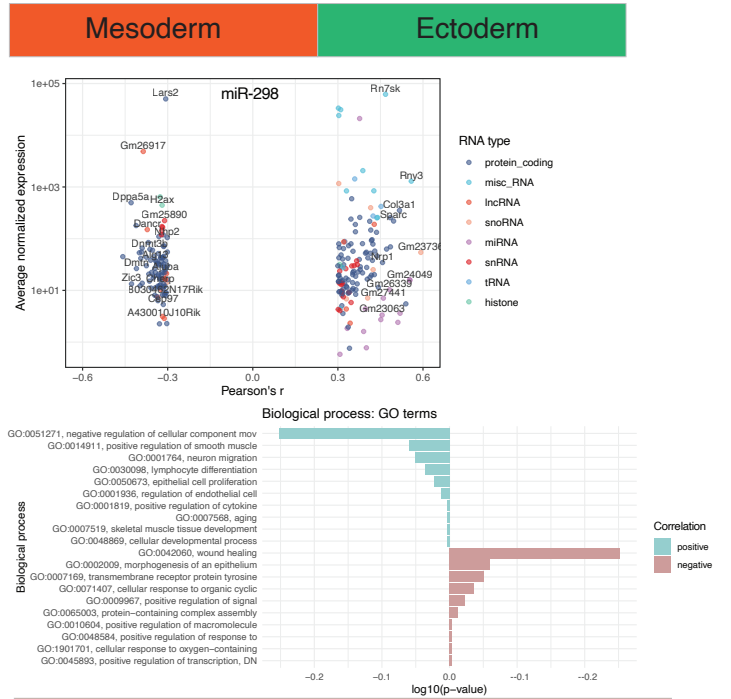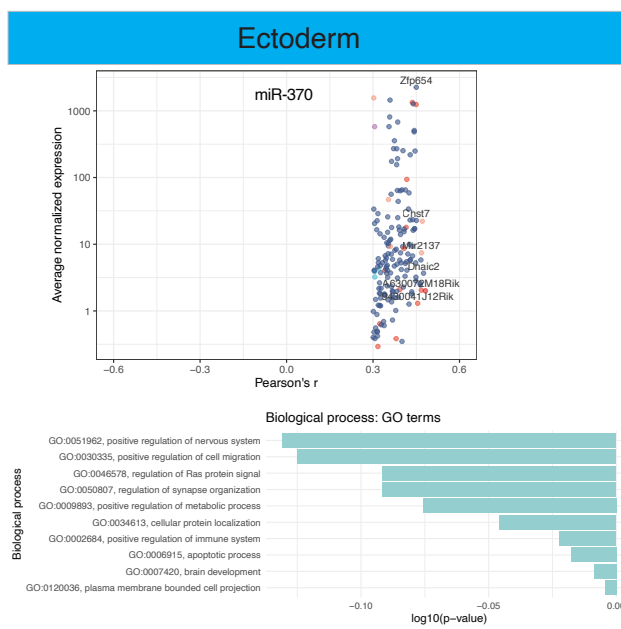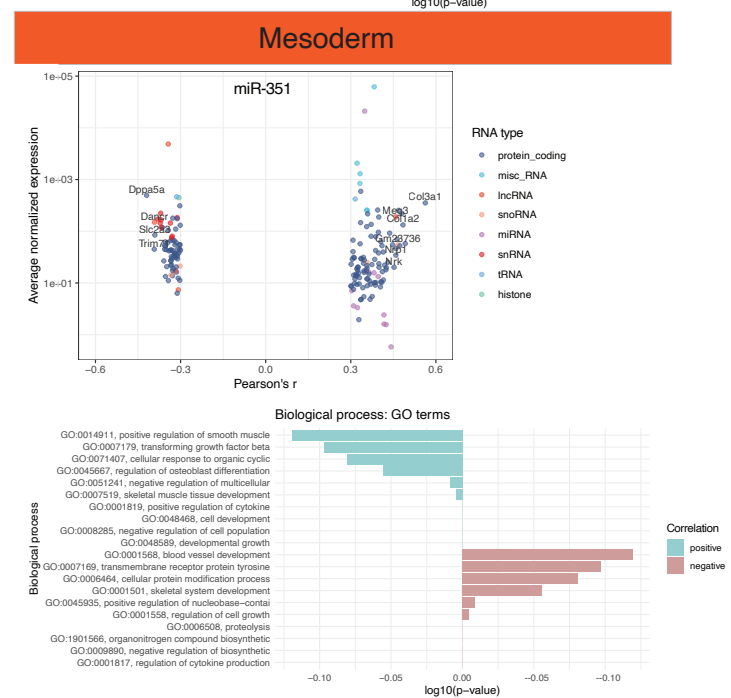

**b**

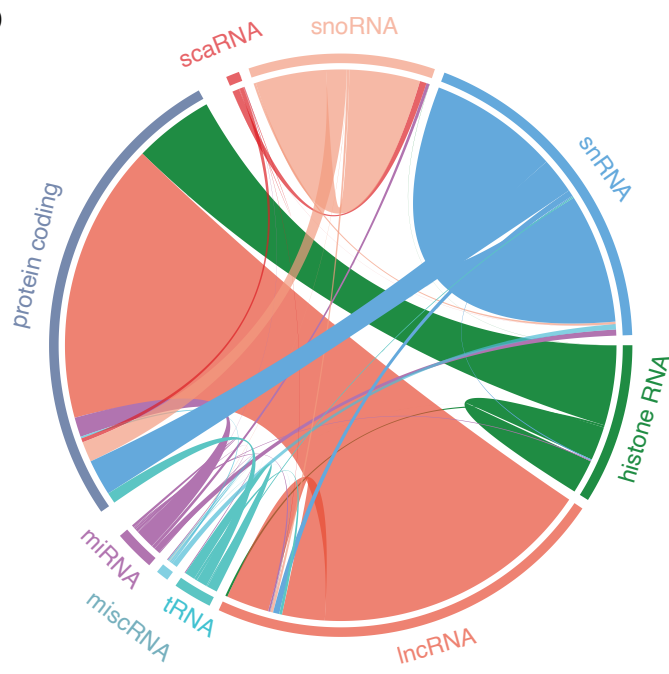

**c**

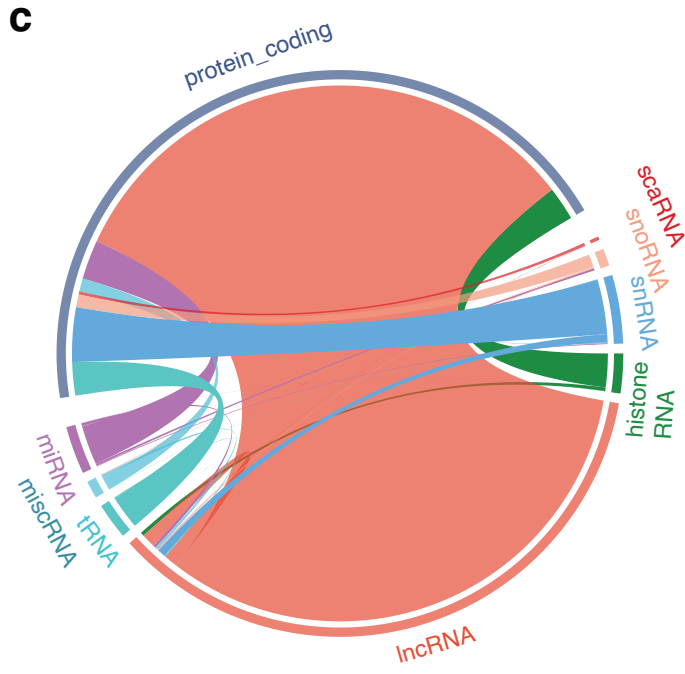

Supplementary table S1.

### 5X Cas9 Buffer Composition

| Reagent                        | Stock Concentration | Final Concentration | 50 mL Example |
|--------------------------------|---------------------|---------------------|---------------|
| HEPES pH 7.4                   | 1 M                 | 100 mM              | 5 mL          |
| KCl                            | 2 M                 | 500 mM              | 12.5 mL       |
| MgCl <sub>2</sub>              | 1 M                 | 25 mM               | 1.25 mL       |
| DTT                            | 100 mM              | 5 mM                | 2.5 mL        |
| Glycerol                       | 100 %               | 25%                 | 12.5 mL       |
| Nuclease-Free H <sub>2</sub> O |                     |                     | 16.25 mL      |
| <b>Total</b>                   |                     |                     | <b>50 mL</b>  |

### crRNA Guide Sequences v1:

| Guide Name         | Guide Sequences (5'-3' excluding PAM sequence) |
|--------------------|------------------------------------------------|
| mm10_RN45s_crRNA1  | UUUAACGAGGAUCCAUGGA                            |
| mm10_RN45s_crRNA2  | GUCUUGUGUGUGUCCUCGCC                           |
| mm10_RN45s_crRNA3  | CCGCCUCGGGGGCGUGCGUU                           |
| mm10_RN45s_crRNA4  | CGCGCCGGUUCGCGUCUGCU                           |
| mm10_RN45s_crRNA5  | AGGCAUCGGUGUGUCGGCAU                           |
| mm10_RN45s_crRNA6  | CGCCUGUGCGCCUGUGCGUA                           |
| mm10_RN45s_crRNA7  | CGCCCGGUCGCGUUCGUGCC                           |
| mm10_RN45s_crRNA8  | CAAUUACCCACUCCCGACC                            |
| mm10_RN45s_crRNA9  | GCCGUGUGCCCGCGCGGUGU                           |
| mm10_RN45s_crRNA10 | GCUGGCCCGCGUCGCGGGUG                           |

|                    |                      |
|--------------------|----------------------|
| mm10_RN45s_crRNA11 | GGUCUGGGGGCGUGCCCUCG |
| mm10_RN45s_crRNA12 | CGGGUCUGUGUGCGCGUGUG |
| mm10_RN45s_crRNA13 | CAUGCAUGUCUAAGUACGCA |
| mm10_RN45s_crRNA14 | UGCCCUCACGUGUUUCACUU |
| mm10_RN45s_crRNA15 | GGGUUUUUGACCCGUCCCGG |
| mm10_RN45s_crRNA16 | GCUGGGGCGGUUGUCGCGUG |
| mm10_RN45s_crRNA17 | UUCGGGCCCCUCCCGGUUGG |
| mm10_RN45s_crRNA18 | UCGUAGUUGGAUCUUGGGAG |
| mm10_RN45s_crRNA19 | GAGUUCGGGGAGGGAUACAG |
| mm10_RN45s_crRNA20 | CCCUUCUCGCGCCUCCCGU  |
| mm10_RN45s_crRNA21 | GAGGAAUUCCCAGUAAGUGC |
| mm10_RN45s_crRNA22 | CUGACCUCGCCACCCUACCG |
| mm10_RN45s_crRNA23 | UCCUCCAUCUCUCGCGCAA  |
| mm10_RN45s_crRNA24 | CGUUAUCCCAUGACCCGCC  |
| mm10_RN45s_crRNA25 | CGGACAUUCAUGGCGAAUGG |
| mm10_RN45s_crRNA26 | GGGUUCGGUCUGGGUCCGUC |
| mm10_RN45s_crRNA27 | CGGGGACGGGACCGUUCUGU |

|                    |                      |
|--------------------|----------------------|
| mm10_RN45s_crRNA28 | UCCGAUAACGAACGAGACUC |
| mm10_RN45s_crRNA29 | CUCUCCUACUUGGAUAACUG |
| mm10_RN45s_crRNA30 | AAGGCAGGGGUGCGGCUCUC |
| mm10_RN45s_crRNA31 | GUGGCGCUUCGUCGGGGUUC |
| mm10_RN45s_crRNA32 | GCGGUUCGGGUGUGUCUUG  |
| mm10_RN45s_crRNA33 | UUAUCAGAUCAAAACCAACC |
| mm10_RN45s_crRNA34 | UUCGUCGUCCGCUCCGGGCG |
| mm10_RN45s_crRNA35 | CUUUCUCUCUGUGGGCGGGU |
| mm10_RN45s_crRNA36 | CUCUUUCUCGAUUCGGUGGG |
| mm10_RN45s_crRNA37 | AGGGAAGUCGGUCGUUCGGG |
| mm10_RN45s_crRNA38 | UCUGAGAAGCCCGUGAGAGG |
| mm10_RN45s_crRNA39 | CAUUAUCAAGAACGAAAGU  |
| mm10_RN45s_crRNA40 | CGGCUAGACGCGGGUGUCGC |
| mm10_RN45s_crRNA41 | CGCGGCAGCGUCCCACGGC  |
| mm10_RN45s_crRNA42 | CUGUGGUUUGGAGGGCGUCC |
| mm10_RN45s_crRNA43 | UUUAGUGAGGCCACGGCCC  |
| mm10_RN45s_crRNA44 | CGUGUCCCGGUGUGGCGGUG |

|                    |                      |
|--------------------|----------------------|
| mm10_RN45s_crRNA45 | AGGUGUCGGAGAGCUGUCCC |
| mm10_RN45s_crRNA46 | AGGUGUGGUGGGACUGCUCA |
| mm10_RN45s_crRNA47 | ACCCGAGAUUGAGCAAUAAC |
| mm10_RN45s_crRNA48 | AAAGGGAAAGAGGCUAGCAG |
| mm10_RN45s_crRNA49 | GCCGCUAGAGGUGAAAUUCU |
| mm10_RN45s_crRNA50 | GGAAUAAUGGAAUAGGACCG |
| mm10_RN45s_crRNA51 | UUCGCUCGCGCUCCCUUACC |
| mm10_RN45s_crRNA52 | UUUGAGAGGCCUGGCUUUCG |
| mm10_RN45s_crRNA53 | CGUUGCAUACCCUUCCCGUC |
| mm10_RN45s_crRNA54 | UGAGCCCCUGCCGCACCCGC |
| mm10_RN45s_crRNA55 | ACCACGGGUGACGGGGAAUC |
| mm10_RN45s_crRNA56 | GCUCUUAGCUGAGUGUCCCG |
| mm10_RN45s_crRNA57 | CUAGGUGCCUGCUUCUGAGC |
| mm10_RN45s_crRNA58 | UUCGGGUUCCCGCGCCUGC  |
| mm10_RN45s_crRNA59 | UCCUCCCCGCUCGCCGCAGC |
| mm10_RN45s_crRNA60 | UGGGGAGUGAAUGGUGCUAC |
| mm10_RN45s_crRNA61 | UCUCGCGGGCGUCCGCGCGG |

|                     |                      |
|---------------------|----------------------|
| mm10_RN45s_crRNA62  | UGUGGUGGUGGCUGGGGAGA |
| mm10_RN45s_crRNA63  | CGGAAGGGCACCACCAGGAG |
| mm10_RN45s_crRNA64  | GGUAGGCAACGGUGGGCUCC |
| mm10_RN45s_crRNA65  | CCCGUUUUUGUCCUCCGC   |
| mm10_RN45s_crRNA66  | GCCGGGGGCUGGCCGUC    |
| mm10_RN5.8s_crRNA67 | CGACACUUCGAACGCACUUG |
| mm10_RN5.8s_crRNA68 | ACUCUUAGCGGUGGAUCACU |
| mm10_RN5.8s_crRNA69 | CGAGAAUUAUGUGAAUUGC  |

**crRNA Guide Sequences v2 (sequences used for the IDT order form):**

**Cytoplasmic rRNA  
and miscRNA**

|                  | <b>Target Sequence</b>        |
|------------------|-------------------------------|
| RNA7SK_1         | GTCCATTTGTAGGAGAACGT          |
| RNA7SK_2         | TCCAAATGAGGCGCTGCATG          |
| RNA7SK_3         | ACCCTACGTTCTCCTACAAA          |
| RNA7SK2_1        | CACTAAGTTCGGCATCAATA          |
| RNA7SK2_2        | GACCACCAGGTTGCCTAAGG          |
| <i>RNA7SK2_3</i> | <i>GGAGTG CAGTGGCTATT CAC</i> |
| 7SL_1            | CACTAAGTTCGGCATCAATA          |
| 7SL_2            | GACCACCAGGTTGCCTAAGG          |
| 5.8S_1           | CGACACTTCGAACGCACTTG          |
| 5.8S_2           | ACTCTTAGCGGTGGATCACT          |
| 5S.1             | TCTGATCTCGGAAGCTAAGC          |
| 5S.2             | CTCCCATCCAAGTACTAACC          |

**mtRNA**

|           |                      |
|-----------|----------------------|
| MT-RNR1_1 | TTGACCTAACGTCTTTACGT |
|-----------|----------------------|

Location in a plate

|            |
|------------|
| A01        |
| A02        |
| A03        |
| A04        |
| A05        |
| (optional) |
| A06        |
| A07        |
| A08        |
| A09        |
| A10        |
| A11        |
|            |
| B01        |

MT-RNR1\_2 CACGAAATTGACCAACCCTG  
 MT-RNR1\_3 AGGGTGAAC TCACTGGAACG  
 MT-RNR1\_4 AGTAGAGTGCTTAGTTGAAC  
 MT-RNR1\_5 GTAGTCTATTTTGTGTCAAC  
 MT-RNR1\_6 AGAGGAGACAAGTCGTAACA  
 MT-RNR1\_7 GGGTTTATCGATTACAGAAC  
 MT-RNR2\_1 CTGAACTCCTCACACCCAAT  
 MT-RNR2\_2 AAGGTTGTCTGGTAGTAAGG  
 MT-RNR2\_3 CCTCACTGTCAACCCAACAC  
 MT-RNR2\_4 GCCGTTAAACATGTGTCACT  
 MT-RNR2\_5 GCTGCTTTTAGGCCTACTAT  
 MT-RNR2\_6 TTGGACAACCAGCTATCACC  
 MT-RNR2\_7 CTGTTCTTAGGTAGCTCGTC  
 MT-RNR2\_8 TGAGATGATATCATTTACGG  
 MT-RNR2\_9 TGTTCCGTTGGTCAAGTTAT  
 MT-RNR2\_10 TTTGGTAGTTTAGGACCTGT  
 MT-RNR2\_11 CTGTATGAATGGCTCCACGA  
 MT-RNR2\_12 TTTAATAGCGGCTGCACCAT

**18S and 28S**

18S\_1 TAGAGTCACCAAAGCCGCCG  
 18S\_2 CTCCAATGGATCCTCGTTAA  
 18S\_3 TAGAGCTAATACATGCCGAC  
 18S\_4 ACGGCTACCACATCCAAGGA  
 18S\_5 AATTACCCACTCCCAGCCCG  
 18S\_6 CATGTCTAAGTACGCACGGC  
 18S\_7 CATGGTGACCACGGGTGACG  
 18S\_8 ACTCAGCTAAGAGCATCGAG  
 18S\_9 AGTCGTAACAAGTTTCCGT  
 18S\_10 CATCCAATCGGTAGTAGCGA  
 18S\_11 CATCACGAATGGGGTTCAAC  
 18S\_12 GTTGAGTCAAATTAAGCCGC  
 18S\_13 ATTCTTGGACCGGCGCAAGA  
 28S\_1 CGGACAAACCCTTGTGTCGA  
 28S\_2 GGACGAAGGGCACTCCGCAC  
 28S\_3 CGGTTCTCTCGTACTGAGC  
 28S\_4 CACTAATAGGGAACGTGAGC  
 28S\_5 ATTCGTAGACGACCTGCTTC

|     |
|-----|
| B02 |
| B03 |
| B04 |
| B05 |
| B06 |
| B07 |
| B08 |
| B09 |
| B10 |
| B11 |
| B12 |
| C01 |
| C02 |
| C03 |
| C04 |
| C05 |
| C06 |
| C07 |

|     |
|-----|
| D01 |
| D02 |
| D03 |
| D04 |
| D05 |
| D06 |
| D07 |
| D08 |
| D09 |
| D10 |
| D11 |
| D12 |
| E01 |
| E02 |
| E03 |
| E04 |
| E05 |
| E06 |

|        |                       |
|--------|-----------------------|
| 28S_6  | GGCTCCCAAACCACGCTCCC  |
| 28S_7  | GGTCGACCCGGGACACGTGC  |
| 28S_8  | CCGTCTGGGACGAACCGCAAC |
| 28S_9  | CTCGTGACCTCTCCTCGGTC  |
| 28S_10 | CCGTCTCGGTCTGGCACTCCG |
| 28S_11 | CTAAGTGTCAAGAGCCGAGA  |
| 28S_12 | GAGGAAGCATTACTGGCTGA  |
| 28S_13 | ACGGTGGAGCTGGGACCACG  |

|     |
|-----|
| E07 |
| E08 |
| E09 |
| E10 |
| E11 |
| E12 |
| F01 |
| F02 |



Supplementary table S2. Smart-seq-total primers used in the present study.

|                                             |                                                                                                        |
|---------------------------------------------|--------------------------------------------------------------------------------------------------------|
| Smart-seq-total v1<br>oligo-dT              | 5'-Biotin-CATAGTCTCGTGGGCTCGGAGATGTGTATAAGAGACAGT30VN-3'                                               |
| Smart-seq-total v1<br>TSO                   | 5'-biotin-<br>dUCGdUCGGCAGCGdUCAGdUdUGdUAdUCAACdUCAGACdUrGrG+G-3'                                      |
| Smart-seq-total v1<br>RV Amp                | 5'-GTCTCGTGGGCTCGGAGATGTG-3'                                                                           |
| Smart-seq-total v1<br>FW Amp                | 5'-TCGTCGGCAGCGTCAGTTGTATCAACT-3'                                                                      |
| Smart-seq-total v1<br>Custom<br>SeqRead1    | 5'- TCGGCAGCGTCAGTTGTATCAACTCAGACATGGG-3'                                                              |
| Smart-seq-total v2<br>oligo-dT              | 5'-biotin-<br>TCGTCGGCAGCGTCAGTTGTATCAACTCAGACNNNNHNNHNNHNNHNNNGCT<br>GTAACTTTTTTTTTTTTTTTTTTTTTTTTTVN |
| Smart-seq-total v2<br>TSO                   | 5'-biotin-AdUGGCdUCGGAGAdUGdUGdUAdUAAGAGACAGdUCdUrGrG+G-3'                                             |
| Smart-seq-total v2<br>RV cDNA Amp           | 5'-TCGTCGGCAGCGTCAGTTG-3'                                                                              |
| Smart-seq-total v2<br>FW cDNA Amp           | 5'- GCTCGGAGATGTGTATAAGAGACAG-3'                                                                       |
| Smart-seq-total v2<br>index Amp             | 5'- GTCTCGTGGGCTCGGAGATGTGTATAAGAGACAGTC-3'                                                            |
| Smart-seq-total v2<br>Custom Read1          | 5'-TCGGCAGCGTCAGTTGTATCAACTCAGACATGGG-3'                                                               |
| Smart-seq-total v2<br>Custom Index<br>Read2 | 5'-GTCTGAGTTGATACAACTGACGCTGCCGACGA-3'                                                                 |

Supplementary table S3. Smart-seq-total cost estimate.

| Step |                                 | Cost per cell | Cumulative cost per cell |
|------|---------------------------------|---------------|--------------------------|
| 1b   | Lysis Plate                     | \$ 0.10       | \$ 0.10                  |
| 2    | Sorted Plate of Cells           | \$ 0.02       | \$ 0.12                  |
| 4a   | polyA + RT Reaction             | \$ 0.21       | \$ 0.33                  |
| 4b   | DNA Preamp Plate                | \$ 0.11       | \$ 0.44                  |
| 5b   | Cleanup (BRAVO)                 | \$ 0.38       | \$ 0.82                  |
| 6    | Quantified DNA Plate            | \$ 0.59       | \$ 1.41                  |
| 7a   | Normalized Lib Plate            | \$ 0.09       | \$ 1.50                  |
| 8    | Tagmentation + amplification    | \$ 0.05       | \$ 1.55                  |
| 9    | Pool, CRISPR-mediated depletion | \$ 0.20       | \$ 1.75                  |
| 10   | Pool, Cleanup (Manual)          | \$ 0.02       | \$ 1.77                  |
|      | Total:                          |               | \$ 1.77                  |

## References

1. Gu, W. *et al.* Depletion of Abundant Sequences by Hybridization (DASH): using Cas9 to remove unwanted high-abundance species in sequencing libraries and molecular counting applications. *Genome Biol* **17**, 41 (2016).
2. Wang, L., Wang, S. & Li, W. RSeQC: quality control of RNA-seq experiments. *Bioinformatics* **28**, 2184–2185 (2012).
3. Svensson, V. *et al.* Power analysis of single-cell RNA-sequencing experiments. *Nat Methods* **14**, 381–387 (2017).
4. Bagnoli, J. W. *et al.* Sensitive and powerful single-cell RNA sequencing using mcSCRB-seq. *Nat Commun* **9**, 2937 (2018).
5. Faridani, O. R. *et al.* Single-cell sequencing of the small-RNA transcriptome. *Nat Biotechnol* **34**, 1264–1266 (2016).
